1 **Interplay between Polycomb PCGF protein interactomes revealed by**  
2 **screening under endogenous conditions**

3

4 **AUTHOR:**

5

6 **Nayla Munawar**<sup>1</sup>, **Kieran Wynne**<sup>2,3</sup>, **Giorgio Oliviero**<sup>3\*</sup>

7

8 Affiliations

9 <sup>1</sup> Department of Chemistry, College of Sciences, United Arabs Emirates  
10 University, Al-Ain 15551, United Arab Emirates

11

12 <sup>2</sup> Conway Institute of Biomolecular and Biomedical Research, University College  
13 Dublin, Dublin 4, Ireland

14

15 <sup>3</sup> Systems Biology Ireland, School of Medicine, University College Dublin, Dublin  
16 4, Ireland.

17

18 \*Author to whom correspondence should be addressed.

19

20

21

22 **ABSTRACT**

23 The six PCGF proteins (PCGF1-6) define the biochemical identity of Polycomb  
24 Repressor Complex 1 (PRC1) subcomplexes. While structural and functional  
25 studies of PRC1 subcomplexes have revealed specialized roles in distinct aspects  
26 of epigenetic regulation, our understanding of variation in protein interaction  
27 networks between the PCGF subunits is incomplete. We carried out an affinity  
28 purification mass spectrometry (AP-MS) screen of subunits PCGF1 (NSPC1),  
29 PCGF2 (MEL18), and PCGF4 (BMI1), using an immunoprecipitation approach  
30 that replicated endogenous cellular conditions in a cell line capable of  
31 differentiation programs. Over 200 interactions were found, including 83 that  
32 had not been described previously. Bioinformatic analysis found that these  
33 interacting proteins covered a range of functional pathways, often focused on cell  
34 biology and chromatin regulation. We found evidence of mutual regulation (at  
35 mRNA and protein level) between distinct PCGF subunits. Furthermore, we

36 confirmed that disruption of each subunit using shRNA results in reduced  
37 proliferation ability. Overall, our work adds to understanding of the role of PCGF  
38 proteins within the wider cellular network.

39

## 40 **INTRODUCTION**

41

42 Chromatin accessibility reflects the degree to which nuclear macromolecules  
43 physically compact DNA into a small volume within the nucleus. It is determined  
44 by the occupancy and topological organization of nucleosomes as well as other  
45 chromatin-binding factors that occlude access to DNA (1). Chromatin-binding  
46 factors cooperatively regulate gene expression throughout alteration of  
47 chromatin architecture. A class known as chromatin re-modelers can rearrange  
48 the accessible or permissive chromatin conformation. These enzymes mainly  
49 regulate Post-Translational Modification (PTM) of the N-terminal tail regions of  
50 the histone proteins, and include functionally related families of  
51 heterooligomeric protein complexes, including the Polycomb Repressive  
52 Complexes (PRC) (2) (3) (4). PRC complexes function to regulate gene  
53 expression during mammalian development (5) (6) (7).

54

55 PRC complexes assemble in two major configurations: Polycomb Repressive  
56 Complex 1 (PRC1) is an E3 ubiquitin ligase that mono-ubiquitylates histone H2A  
57 at lysine 119 (H2AK119ub1), while Polycomb Repressive Complex 2 (PRC2)  
58 houses a methyltransferase that can mono-, di-, and tri-methylate histone H3 at  
59 lysine 27 (H3K27me1, H3K27me2, and H3K27me3) (8) (9). Some non-histone  
60 substrates (e.g. STAT3, ROR $\alpha$ ) can also be methylated (10).

61

62 The core of the PRC2 enzyme complex is composed of four proteins: EZH1/2,  
63 EED, SUZ12, and RBAP46/48 (11) (12). However, accessory PRC subunits have  
64 been described, such as AEBP2, JARID2, PCL1 (PHF1), PCL2 (MTF2) and PCL3  
65 (PHF19) (12). Some combinations of these accessory proteins are mutually  
66 exclusive, for example JARID2 in combination with most of the other accessory  
67 proteins (13) (14).

68

69 Biochemical analysis of PRC1 complexes has also revealed a variety of  
70 alternative forms. PRC1 complexes consist of a RING1 protein (RING1A or  
71 RING1B) and one of six alternative Polycomb Group Ring Finger proteins  
72 (PCGF1–6) (8) (15). PCGF1, PCGF2, PCGF3, PCGF4, PCGF5 and PCGF6 are also  
73 known as NSPC1, MEL18, RNF3, BMI1, RNF159 and MBLR respectively. PRC1  
74 complexes can be classified into canonical or non-canonical forms (cPRC1 and  
75 ncPRC1) (8). Both complexes mediate histone H2A monoubiquitination via the  
76 E3 ubiquitin ligase component RING1A/B. In addition, cPRC1 complexes contain  
77 CBX (chromobox) proteins that target the complex trimethylated lysine 27 on  
78 histone 3 (H3K27me3).

79

80 In ncPRC1 complexes, RYBP or YAF2 recognize the H2AK119ub1, resulting in a  
81 form of positive feedback (16). In general, cPRC1 complexes are associated with  
82 chromatin condensation events, while ncPRC1 are linked to stronger  
83 ubiquitination activity (8). In mouse embryonic stem cells, PRC1-dependent  
84 H2AK119ub1 leads to recruitment of PRC2 and H3K27me3 to effectively initiate  
85 a polycomb domain. This activity is relative restricted to the ncPRC1 variant  
86 PCGF1-PRC1 complex that recognizes non-methylated DNA in CGIs by the CxxC-  
87 ZF domain of KDM2B (17). This contributes to histone H2A lysine 119  
88 ubiquitylation and gene repression (17) (18) (19).

89

90 Polycomb proteins coordinate major differentiation and developmental proteins  
91 in many cellular contexts. PRC components have been identified as positive  
92 regulators of mESC self-renewal and differentiation pathways (7) (20) (21).  
93 Additionally, abnormal PRC protein expression and/or mutation can lead to  
94 impaired signaling that inhibits tumor suppressor activity, or promotes proto-  
95 oncogene activity, leading to loss of cell identity (9) (22) (23). Hence, much  
96 research related to Polycomb-mediated gene repression has employed mouse  
97 embryonic stem cell (mESC), a powerful yet accessible model (24) (25) (20).

98

99 Pluripotent embryonic carcinoma cell lines, such as NTera-2/cloneD1 (NT2), are  
100 an important tool for studying pluripotent and stem cell-like differentiation  
101 programs in a human model (26) (27) (28). Upon treatment with retinoic acid

102 (RA), NT2 cells can be induced to differentiate into neuron-like cells, which  
103 display a variety of neurotransmitter phenotypes (29) (30) (31).

104

105 We previously investigated the PRC1 complex in the NT2 cell model. We focused  
106 on the role of PCGF1/NSPC1, a subunit of ncPRC1 complex that functions to  
107 maintain the embryonic cell fate by interacting with pluripotency markers such  
108 as OCT4, NANOG and DPPA4 (32). The combination of affinity purification and  
109 high resolution/high mass accuracy mass spectrometry allows the mapping of  
110 protein interaction networks in unprecedented detail (33) (34).

111

112 We extended this investigation to include the PCGF proteins PCGF2 and PCGF4.  
113 While these proteins share significant amino acid homologies, they form distinct  
114 interaction networks in NT2 cells. Notably the two cPRC1 proteins, PCGF2 and  
115 PCGF4, each interact with a subset of unique proteins in addition to a shared set,  
116 despite sharing 64% amino acid sequence homology. We report that despite all  
117 three PCGFs sharing a certain degree of protein homology, this does not imply  
118 that they share similar biological functions.

119

120

121

122

123

124

## 125 **RESULTS**

126

127 A physical interaction screen for PRC1 components purified under endogenous  
128 conditions.

129

130 We used an immunoprecipitation approach, combined with high-resolution mass  
131 spectrometry, to identify physical protein interactions of PRC1 components in  
132 NT2 cells, while avoiding artefacts arising from overexpression (Figure 1A).  
133 Briefly, nuclear lysates were immunoprecipitated with anti-PCGF1, anti-PCGF2,  
134 anti-PCGF4, with anti-Rabbit IgG antibody used as negative control. We also  
135 included a screen of anti-RNF2/RING1B, the catalytic enzymatic core of PRC1  
136 complexes. This protein is therefore an interactor with all PRC1 complexes  
137 containing PCGF subunits. Each lysate was subsequently digested using trypsin  
138 immobilized on agarose beads to yield soluble peptides. The peptides were  
139 desalted, adsorbed onto C18 zip tips, eluted in high acetonitrile, and separated  
140 online by nano-chromatography interfaced with a Q Exactive mass spectrometer  
141 (Supplementary material). Lastly, mass spectrometry raw data were used to  
142 identify and determine the relative abundance of the proteins, using the  
143 MaxQuant platform (35).

144

145 Two protein domains are shared across all the PCGF subunits: RING finger and  
146 RAWUL domains (36). These domains likely play an important role during  
147 assembly of the PRC1 complexes (37) (38). Comparison of the amino acid  
148 sequences of the PCFG variants using multiple alignment (39) shows that the  
149 highest sequence homology among them is between PCGF2 and PCGF4 (Figure  
150 1B). Interestingly, PCGF2 and PCGF4 also contain extended C-terminal regions  
151 that may be associated with disorder (40) (41). Weaker levels of homology were  
152 observed between other PCGF components.

153

154 We carried out preliminary experiments to confirm that our approach was  
155 sensitive and reproducible. Comparison of mass spectrometry peptide intensity  
156 signals for replicate (Biological) repeats confirms that experimental  
157 reproducibility was high. The average Pearson correlation between replicates

158 was ~0.95 for biological replicates (Figure 1C). The replicate experiments  
159 showed a high degree of correlation. Between immunoprecipitations, reasonable  
160 correlation (~ 0.6 – 0.7) observed for the three PCGF proteins, while the single  
161 non-PCGF protein analysis (RNF2) showed slightly lower correlation (~ 0.5), as  
162 expected.

163

164 In order to evaluate the overall dataset, we used principal component analysis  
165 (PCA) using the summed peptide mass spectrometry signal intensities for each  
166 identified protein as input ('Label Free Quantitation' value from MaxQuant) (42)  
167 (Figure 1D). Reassuringly, each immunoprecipitation experiment was well  
168 separated while the biological experimental replicates were located close  
169 together.

170

171 AP-MS screening reveals common and distinct interactomes among PRC1  
172 component proteins.

173

174 To assess the distinctive PCGF subunit interactomes, we compared protein  
175 abundance in samples immunoprecipitated using  $\alpha$ -PCGF1,  $\alpha$ -PCGF2,  $\alpha$ -PCGF4,  
176 and  $\alpha$ -RNF2 (RING1B) to samples immunoprecipitated using IgG as a negative  
177 control (supplementary material). The specificity and effectiveness of the  
178 antibodies was confirmed using co-immunoprecipitation experiments (Figure 2A  
179 and supplementary material). Each antibody immunocaptured its cognate bait  
180 protein, while all three baits co-precipitated the expected common PRC1  
181 complex subunit RING1A and RING1B an E3 ubiquitin ligase for H2AK119ub and  
182 essential component of PRC1 in mammals (43) (44).

183

184 To support our strategy, we investigated the RNF2 interactome as PRC1 quality  
185 control. In line with previous PRC1 interactome analyses (45) (46), RNF2 was  
186 immunoprecipitated with all six PCGF subunits (supplementary material).  
187 Volcano plots were used to project each protein onto a chart showing  
188 enrichment in each immunoprecipitation experiment relative to the IgG control  
189 (x-axis) versus the significance of that finding based on the t-test (y-axis) (Figure  
190 2B).

191 A total of 48 interactions were shared across all PCGF proteins (Figure 2C).  
192 PCGF2 and PCGF4 shared 42 interactions, while PCGF1 and PCGF2 shared 19  
193 candidate interactors, and PCGF1 and PCGF4 had 65 interactors in common. In  
194 general, the proteins observed to interact in NT2 cells correlated well with those  
195 reported by Hauri, Gao and Wiederschain *et al.* (45) (46) (47), suggesting that  
196 the composition of PRC1 complexes are reasonably conserved despite different  
197 cellular contexts (Supplementary material).

198

199 The BCOR component of the non-canonical PRC1 complexes was precipitated as  
200 expected by anti-PCGF1, while the canonical complexes were not. The PCGF1  
201 interactome also exhibited non-canonical PRC1 co-factors, such as BCORL1 and  
202 SKP1.

203 The PCGF2 and PCGF4 interactomes contained the chromo-domain protein CX2,  
204 CBX4 and CBX8, as expected for canonical PRC1 complexes.

205

206 As with all classification attempts, these PCGF-PRC1 variants need to be  
207 simplified somewhat. One can gain an insight into the difficulties encountered in  
208 correctly categorizing these complexes upon consideration of the number of cell  
209 types in conjunction with the multiple protein characterization strategies  
210 employed. It is also important to mention that PRC1 complexes are highly  
211 dynamic structures that evolve in tandem with progression between cell states  
212 (46) (48). In this study, we aimed to elucidate the PCGF-PRC1 architecture in the  
213 presence of auxiliary subunits, classified as either non-canonical or canonical  
214 PRC1 employed affinity proteins purified in native conditions.

215

216 In line with a certain degree of protein homology divergence across all PCGF  
217 subunits, we reported that the BCOR component of non-canonical PRC1  
218 complexes is precipitated as expected by anti-PCGF1. We subsequently observed  
219 that the PCGF2 and PCGF4 subunits co-purified and shared the same chromo-  
220 domain proteins and ubiquitin ligase modules, as expected for canonical PRC1  
221 complexes. Overall, we observed that the PCGF interactomes contained a  
222 heterogeneous collection of subunits, sometimes in a sub-stoichiometric manner,



223 demonstrating the differences inherent in the PRC1 architecture. In addition, the  
224 native PCGF interactome had not completely elucidated.

225

226 We compared our data with the Gao and Hauri *et al* studies (45) (46), using a  
227 Venn diagram to determine common and unique PRC1 features obtained from  
228 diverse protein characterization strategies (supplementary material). We found  
229 that all the PCGF-candidate interactors reported by Gao and Hauri *et al* were also  
230 identified by us, being shared across the three studies. We also observed  
231 interaction candidates not yet described: 191 in the PCGF1, 207 in the PCGF2,  
232 and 237 in the PCGF4 interactome (Supplementary material).

233

234 The differences between the two studies may be due to the analytical strategies  
235 performed and/or the context of the biological samples being analyzed. In  
236 contrast to our use of NT2 cells, Gao *et al* used an affinity-tagged strategy in  
237 293TREx cells (45). A similar strategy was employed by Hauri *et al* (46) who  
238 generated stable HEK293 cell lines exhibiting a tetracycline-inducible expression  
239 of several polycomb group components.

240

241

242 Stoichiometry and molecular mass of the isolated PRC1 complexes.

243

244 Many of the interactions we identify are components of other chromatin re-  
245 modelers (Figure 2B and supplementary material).

246 By retrieve the most recent depository chromatin remodelling complex (49) (50)  
247 (51) we specifically detected the following: Ada2a-containing (ATAC) ATAC;  
248 Carbon catabolite repression (CCR4) negative; inhibitor of growth (ING); mixed  
249 lineage leukemia (MLL); nucleosome remodeling and deacetylases (NuRD); Spt-  
250 Ada-Gcn5 acetyltransferase (SAGA); SET domain-containing protein (SET);  
251 histone deacetylase complex subunit (SIN3A); SWItch/Sucrose Non-Fermentable  
252 (SWI/SNF); and the general transcription factor IID (TFIID). These results are in  
253 line with Hauri *et al.*, who reported PRC1 and PRC2 co-purified with several  
254 chromatin remodeling subunits encompassing MLL, NSL, ADA2/GCN5/ADA3  
255 transcription activator, NURF, NURD, and SIN3 complexes (46).



256 We also distinguished unique and different chromatin re-modelers which are not  
257 yet assigned, such as a CCR4-NOT complex uniquely co-purified with PCGF1. We  
258 also observed CNOT1 and CNOT4 subunits. Both CNOT1 and CNOT4 are involved  
259 in E3 ligase activity and promote histone ubiquitination (52) (53). In addition,  
260 we identified other subunits such as ARID2, ATRX, BRD7, SMARCB1, SMARCA4,  
261 SMARCC1, SMARCC2, SMARCD1, SMARCD2, and SMARCE1 (54) (55). The  
262 mechanism by which BAF complex disengagement leads to polycomb repressor  
263 complex-driven re-establishment of heterochromatin signatures associated with  
264 gene repression is still not defined (55). We did not perform any further  
265 immunoblotting validation for these novel candidates due to the lack of highly  
266 specific antibodies against them.

267

268 Since PRC1 is itself a high molecular weight (MW) multiprotein assembly, and  
269 these potential interactors are themselves components of multiprotein  
270 assemblies, we next focused on analyzing the physical form of the PRC1  
271 complexes that we isolated. First, we estimated stoichiometry by dividing the  
272 normalized mass spectrometry intensity signal for each protein (LFQ) by the  
273 protein MW (iBAQ score) (56) (Figure 3A). Core members of the PRC1 complex  
274 (such as RNF2, RING1A, KDM2B, USP7, CSNK2B, and PHC3) that are shared  
275 among all three PCGF-PRC1 interactome complexes were present in  
276 approximately equal stoichiometry. PCGF2- PRC1 and PCGF4-PRC1 variant  
277 interactomes exhibited a common stoichiometric pattern profile and shared  
278 canonical PRC1 subunits including the following chromobox proteins: PHC1,  
279 PHC2, CB2, CBX4, CBX8, SCML2, SCMH1, RBBP4, and RBBP7.

280

281 To investigate the molecular mass of the isolated complexes, nuclear protein  
282 lysate from NT2 cells was separated by size exclusion chromatography and the  
283 fractions probed using antibodies against PCGF1, PCGF2, PCGF4, and RNF2  
284 (Figure 3B). All four PRC1 component proteins were found to be present in high  
285 mass complexes. These varied greatly in size, from 200KDa to 4MDa. The size  
286 exclusion experiments confirms that the high mass complexes that contain  
287 PCGF2 and PCGF4 are largely overlapping, while the PCGF1 profile seems to  
288 belong to a higher mass range complex.

## 289 Functional enrichment of PCGF interactomes map to multiple pathways.

290

291 Next, we asked if the observed interactomes were associated with particular  
292 molecular pathways. We used the Gene Ontology (GO) analysis (“BP”, “biological  
293 process”) (Figure 4A) to investigate this. We first analyzed the whole PCGF  
294 interactome to create a comprehensive overview mapping of pathways  
295 associated with the PCGF interactomes. The functional categories are displayed  
296 in a dot plot cluster and represent the significant biological process enriched.  
297 Overall, five main categories were found to be significantly enriched: “mRNA  
298 splicing”, “regulation of chromosome organization”, “histone ubiquitination”,  
299 “regulation of G0 to G1 transition”, and “histone monoubiquitination”.

300

301 We performed similar analysis among the distinctive PCGF interactomes to  
302 assess the unique pathways which may affect the PRC1 organization through  
303 their unique PCGFs features (Figure 4B). The PCGF2 and PCGF4 interactomes  
304 exhibited similar biological functional properties, including common biological  
305 annotations such as “regulation of chromosome organization”, “transcription,  
306 DNA-templated”, and “chromatin remodeling”. We also observed cell cycle-  
307 related terms such as “negative regulation of G0 to G1 transition” as uniquely  
308 enriched pathways in PCGF4 interactomes, while “histone ubiquitination”  
309 categories were shared between the PCGF1 and PCGF2 interactomes. Overall, we  
310 observed distinctive PCGF interactomes which revealed a different biological  
311 function related to each PCGF interactome. We also confirmed associated  
312 functional biology concepts that are known to be Polycomb-related.

313

## 314 The role of PCGF subunits in NT2 cells.

315

316 In order to assess the functional effect of disrupting PCGF expression in NT2  
317 cells, we carried out a knockdown screen for the PCGF subunits. Successful  
318 knockdown of each PCGF variant was achieved using the shRNA method (Figure  
319 5A). As expected, global levels of H2BK119ub were reduced, most prominently  
320 for PCGF4, in line with previous reports (57). Furthermore, levels of PCGF4  
321 mRNA itself were reduced following knockdown of PCGF2, and vice versa. This

322 suggests that PCGF2 and PCGF4 may influence their regulation both at  
323 transcriptional and protein levels. This corroborates previous evidence of a  
324 synergistic requirement for these PcG proteins in the maintenance *Hox* gene  
325 expression during early mouse development (58). Mouse embryos deficient for  
326 PCGF2 and PCGF4 exhibit similar posterior transformations of the axial skeleton  
327 and display severe immune deficiency (58).

328

329 Conversely, some minor effects of PCGF1 protein expression alteration seem to  
330 be detected during PCGF2 downregulation. These results suggest an auto-  
331 regulatory activity among many, or even all, PCGF genes. In order to observe  
332 differences at a phenotype level during the depletion of PCGF subunits, we  
333 performed cell viability experiments over a time course using the crystal violet  
334 assay (Figure 5B). We monitored the cell growth rate in the presence or absence  
335 of PCGF gene expression. We compared and screened the most efficient shRNA  
336 construct on HEK293 cells and selected those shown to have a higher  
337 knockdown efficiency to the corresponding PCGF subunits (supplementary  
338 material material).

339

340 We subsequently generated PCGF lentivirus for quantitative assessment of gene  
341 knockdown expression in NT2 cells (Figure 5C). We observed that cell growth  
342 rate is reduced after four days following disruption of PCGF4 expression. A  
343 similar trend, although slightly less pronounced, was observed for PCGF2  
344 depletion, while in PCGF1 samples the cell proliferation rate did not change  
345 (Figure 5 B,C). The observation that PCGF4 can influence growth rate raises the  
346 possibility of a mechanism related to senescence. In line with a previous study,  
347 regulatory mechanisms yielded by PCGF4 expression controls the cell cycle  
348 through the regulation of the *Ink4a/Arf* locus (59) (60). To confirm this, we  
349 measured the mRNA and protein levels of *p16*, a senescence marker (61) (62), at  
350 protein and transcriptome level respectively (Figure 5E). Interestingly, only  
351 PCGF4 was found to influence the cell viability through *p16* expression (Figure 5  
352 D,E). This may suggest that other PCGF proteins can influence cell growth via  
353 independent, non-senescent pathways.

354

355 **DISCUSSION**

356

357 In the last decade the PRC1 complex has been intensively investigated (63) (64).

358 A recent study involved the dissection of the PRC1 assembly composition and

359 indicated that six different PRC1 variants existed. Each PRC1 variant exhibited a

360 different PCGF subunit, indicating that PRC1 complexes contain mutually

361 exclusive homologs of the PCGF protein (15) (45) (65).

362

363 There are several mammalian PRC1 complexes, each characterized by a single

364 homolog (in different combinations) of the *Drosophila* proteins Psc (PCGF1-6),

365 Ph (PHC1-3), Pc (CBX2, 4, 6, 7, and 8), Sce (RING1A/RNF2), and Yaf2 (RYBP).

366 Canonical PRC1 complexes also contain homologs of the chromatin reader

367 protein, CBX, which exhibited chromo-domains and are recruited to chromatin

368 via their ability to bind the PRC2-mediated H3K27me3 mark (8) (66) (67).

369

370 Non-canonical PRC1 complexes, which do not contain CBX subunits, are able to

371 recognize the Polycomb target gene through other auxiliary proteins, such as

372 BCOR or KDM2B (18) (68) (69). However, all PRC1 complexes contain the

373 RNF2/RING1b and RING1/RING1a E3 ubiquitin ligase enzymes that target

374 histone H2A lysine 119 for mono-ubiquitination (H2AK119ub) (68) (69). This

375 histone mark co-localizes genome-wide with the PRC2-mediated H3K27me3

376 histone mark and is associated with chromatin compaction and promotion of

377 gene silence (64) (70).

378

379 We investigated the physical interactomes of selected PCGF subunits. PCGF1,

380 PCGF2, and PCGF4 showed a degree of protein sequence homology and were

381 expressed in NT2 cells. We didn't attempt to investigate the other PCGF proteins

382 due to the lack of commercially available antibodies. In NT2 cells, the protein

383 dynamic range analysis suggested a lower protein expression level for PCGF3,

384 PCGF5, and PCGF6. Accordingly, the PCGF-PRC1 architecture may not reflect the

385 native organization (supplementary material).

386

387 Previous studies identified two domains shared across all the PCGF proteins:  
388 RING finger and RAWUL (37) (36). The contribution made by the RING finger  
389 and RAWUL domains may play an important role in defining PRC1 composition.  
390 How non-canonical PRC1 subcomplexes are recruited to chromatin remains less  
391 understood (63) . In B-cell lymphoma 6 (BCL6), the interacting co-repressor  
392 (BCOR) forms a complex with RING1/RNF2, RYBP, PCGF1, and KDM2B, causing  
393 transcriptional repression during lymphocyte development (69) (71). The direct  
394 binding partner of PCGF1 is BCOR, which has emerged as an important player in  
395 development and health (38) (72) (73). Recruitment of non-canonical PRC1  
396 complex to chromatin depends on its KDM2B subunit, which can recognize  
397 unmethylated CpG islands (74) (68). The activities of non-canonical PRC1  
398 complexes showed that recruitment of the PCGF1-PRC1 variant results in  
399 H2AK119 ubiquitylation. This can promote the recruitment and/or stabilization  
400 of PRC2 to the chromatin and reinforce the deposition of H3K27me3 (18).

401

402 In mammals and in *Drosophila*, PCGF2 and PCGF4 share most of their Polycomb  
403 subunits including a group of related proteins, termed Polyhomeotic (PHC1, 2,  
404 and 3) (75). PCGF2 and PCGF4 are considered to form canonical-PRC1 complexes  
405 and bind to chromatin via CBX proteins that recognizes H3K27me3 (8) (67).

406

407 Recently, the role of PRC1-6 subcomplexes was studied by combining the  
408 development of highly specific PCGF1-6 antibodies in-house, with the generation  
409 KO mESC lines depleted for all six PCGF proteins (15) (65). The genome-wide  
410 occupancy of all PRC1 subcomplexes was mapped to determine their functional  
411 control in pluripotent cell modelling. The results suggested that the activities of  
412 PCGF1 and PCGF2 are strongly linked with transcriptional repression and  
413 display extensive functional overlap (15). In mouse cells, the PCGF2 and PCGF4  
414 double mutant embryos exhibit severe growth retardation, accelerated  
415 apoptosis, and defects in the maintenance of stable gene expression during early  
416 development .(58)

417

418 PCGF2, is also involved in cell proliferation, differentiation, and embryogenesis  
419 (41). PCGF2 is a target of the protein kinase AKT (76). AKT phosphorylates

420 PCGF2 to disrupt the interaction between PCGF2 and other PRC1 members that  
421 cause tumorigenesis in breast cancer (60) (77). Missense substitutions of the  
422 Pro65 residue of PCGF2 shows severe clinical outcomes recognizable as  
423 developmental delay, intellectual disability, impaired growth and several brain,  
424 cardiovascular, and skeletal abnormalities (41). PCGF2 has also been found to be  
425 essential for ESC differentiation into early cardiac-mesoderm precursors, and  
426 exhibits a distinctive PCGF2-PRC1 activity to control the expression of the  
427 negative regulators of the BMP pathway and genes involved in cardiac  
428 development (48).

429

430 PCGF4 was the first PCGF protein identified based on its ability to act as an  
431 oncogene, collaborating with c-MYC in a transgenic model of a mouse lymphoma  
432 (78) (79). Further studies have attributed this oncogenicity to the ability of  
433 PCGF4 to directly repress the *INK4A/ARF* gene locus, which encodes the tumor  
434 suppressors p16INK4A and p14ARF (59) (60). The repression of these two genes  
435 leads to increased proliferative capacity and delayed senescence in mammalian  
436 cells. Bmi1-null mice display severely impaired stem cell self-renewal in the  
437 neural, mammary, and hematopoietic lineages (58) (80) (81).

438

439 These phenotypes are largely associated with a failure to repress the expression  
440 of the *Ink4a/Arf* locus, although co-deletion of this locus leads to only a partial  
441 rescue of the stem cell self-renewal phenotype (81). Furthermore, in a mouse  
442 model of glioma, Bmi1 expression was shown to enhance tumor progression  
443 even in *Ink4A/Arf*-null cells (82). This data suggests that BMI1 has functions in  
444 cancer development and stem cell biology, independently of the *p16INK4A* and  
445 *p14/p19ARF* pathways. Furthermore, PCGF4 is required for the self-renewal of  
446 NSCs in the peripheral and central nervous systems, but not for their  
447 proliferation or differentiation (83).

448

449 In our study we evaluated the role of PCGF-PRC1 organization in NT2 cells, a cell  
450 therapy model for the investigation of human neurogenesis, regeneration, and  
451 drug screening (26) (27) (28). For over two decades, the role of Polycomb-  
452 mediated gene repression has been dissected mostly in mouse embryonic stem



453 cells (mESC), which is considered a “gold standard” model for epigenetics  
454 research (24) (25) (20). The focus on this method has limited Polycomb  
455 characterization in other cell models, such as cell types that reflect the  
456 tumorigenesis environment or exhibited cancer genotype and heterogeneity. We  
457 asked if differences in PCGF-PCR1 composition may be reflected by divergence at  
458 the protein sequence level, or if they may be influenced by differences at the  
459 protein-protein interaction level.

460

461 We favored an endogenous immunoprecipitation approach of analyzing PCGF1,  
462 PCGF2, and PCGF4 subunits to characterize the behavior of the PCGF-PCR1  
463 variant in a manner as close to the native cell condition as possible, and  
464 particularly to avoid artefacts arising from exogenous expression affinity-tagged  
465 form. Subsequently, we applied a label-free mass spectrometry strategy to  
466 dissect the PCGF-PCR1 variant assembly and distinguish individual interactors  
467 that associated preferentially in only one PCGF-PCR1 variant, in two PCGF-PCR1  
468 variants, or in all three PCGF-PCR1 variants.

469

470 We observed a significant degree of common interactions among each purified  
471 PCGF, consistent with previous reports by Gao, Hauri, and Wiederschain *et al.*  
472 This suggests that the composition of PRC1 complexes is reasonably conserved,  
473 despite a difference in cellular contexts. Our study also found novel interactors.  
474 We favored an endogenous immunoprecipitation approach to mimic the native  
475 physiological cell environment. In contrast, previous studies have employed the  
476 tandem affinity purification method, which may partially explain the differences  
477 between the two strategies (84).

478

479 Ectopic protein expression following tandem affinity purification was unable to  
480 isolate and identify interacting proteins in 22% of purified tagged proteins in  
481 yeast proteome (85). The intrinsic quality of the TAP tag may affect the affinity  
482 binding efficiency. Therefore, a relatively low efficiency of purification can be  
483 observed. This may explain the large amount of novel chromatin remodeling  
484 subunits detected in our strategy, in comparison with previous reports.

485



486 The TAP tag added to a target protein may interfere with protein function,  
487 location, and complex formation, which is particularly relevant between PCGF2  
488 and PCGF4 as they share sequence homology. Another limit of the TAP strategy  
489 comes from the competition of endogenous proteins with the tagged protein,  
490 especially if the tagged protein is located in a protein complex, which may  
491 explain why PCGF2 and PCGF4 were not present in a complex with each other.

492

493 PcG was originally described as a set of genes responsible for controlling proper  
494 body segmentation in *Drosophila* (86). Subsequently, the function of PcG was  
495 dissected in mammalian models and shown to play a crucial role in regulation in  
496 stem cells and embryonic development (7). This supports the selection of NT2  
497 cells as models to simulate stem cell characteristics, which may explain the  
498 detection of several chromatin re-modelling subunits mainly identified as master  
499 regulators of gene expression via chromatin modifications and compaction.

500

501 We then dissected the distinctive functional biological of the PCGF-PRC1  
502 assembly through Gene Ontology (GO) analysis, to create a comprehensive map  
503 of the chromatin pathway environment and to improve gene-annotation  
504 enrichment analyses related to chromatin environment (which was poorly  
505 annotated). We reported cell cycle-related terms such as “negative regulation of  
506 G0 to G1 transition” as uniquely enriched pathways in the PCGF4 interactome,  
507 while, as expected, “histone H2A ubiquitination” related categories were shared  
508 across all three PCGF4.

509

510 Lastly, we investigated the role of PCGF subunits in gene regulation of NT2 cells  
511 using knockdown screening against the cognate PCGF subunits. We observed  
512 through cell viability assay that PCGF4 uniquely affects cell proliferation, rather  
513 than the other PCGF auxiliaries.

514

515 Despite PCGF2 and PCGF4 sharing amino acid sequence homology and  
516 overlapping interactomes, only PCGF4 directly regulated the expression of  
517 *INK4a/ARF*. Possible support for this idea was observed in Morey *et. al.* (48),  
518 where expression of PCGF2 gradually diminished upon differentiation in mESCs,

519 while in contrast the protein level of PCGF4 upregulated. Pluripotent mESC does  
520 not express detectable levels of PCGF4 in either protein or transcriptional levels,  
521 and forced PCGF4 expression had no obvious influence on mESC self-renewal  
522 (87).

523

524 Overall, our experiments yielded important insights into the composition of  
525 PCGF-PRC1 assembly complexes and linked alternative PRC1-related complexes  
526 to distinct molecular functions. Importantly, we showed a unique link between  
527 PCGF4 and p16 expression, potentially linking this protein (and hence the  
528 PCGF4-PRC1 complex) to the process of senescence.

529

530 In line with previous studies, unique complex components have also been  
531 identified for different PCGF homologs, which suggests that they are not  
532 completely redundant and that they may also have some independent functions  
533 (15) (45). Further insights into the genome-wide localization and complex  
534 composition of variant PRC1 complexes in different cellular contexts will likely  
535 add to our understanding of their individual and overlapping functions and  
536 contribute to our understanding of the PRC1 assembly.

537

538 To date, the notion that sequence homology implies functional similarity through  
539 common interactor partners is still not proven. Furthermore, how protein  
540 similarity may influence the organization of a chromatin re-modeler has still not  
541 been elucidated. The investigation of the proteome interactome landscape  
542 appears to be a very important distinguishing factor in the definition of the  
543 degree of protein similarity in protein families. The integration of protein  
544 homology analysis and affinity purification, followed by mass spectrometry  
545 analysis, may open a new avenue in solving one of the central problems in  
546 modern biology: the aim of identifying the complete set of protein interactions  
547 in, and important biological processes of, a cell, including catalyzing metabolic  
548 reactions, DNA replication, DNA transcription, responding to stimuli, and  
549 transporting molecules from one location to another.

550

551

552

553

554

555

556

557

## 558 MATERIAL AND METHODS

559

### 560 Cell culture

561 Ntera-2/cloned1 (NT2) cells (ATCC, CRL-1973) were cultured in 92mm tissue  
562 culture dishes Nunclon (Fisher Scientific) in Dulbecco's Modified Eagle Medium  
563 (DMEM) supplemented with 10% (v/v) Fetal Bovine Serum (Hyclone), 100U/ml  
564 penicillin and 100U/ml streptomycin (Gibco). Cells were passaged by  
565 trypsinizing with 0.25% Trypsin-EDTA (Invitrogen) and plated at a ratio of 1:6.  
566 For Lentivirus generation HEK293T cells were grown in DMEM medium  
567 supplemented with 10% (v/v) FBS (Hyclone), 100U/ml-1 penicillin, and  
568 100U/ml-1 streptomycin (Gibco) and plated at a ratio of 1:10.

569

570

### 571 Isolation of Nuclei

572 Harvested NT2 cells were washed in PBS and resuspended in Lysis buffer  
573 (25mm Tris·HCl pH 7.6, 150mm NaCl, 1% Nonidet P-40, 1% sodium  
574 deoxycholate, 0.1% SDS, 2µg/ml Aprotinin, 1µg/ml, Leupeptin, 10mm PMSF).  
575 The lysates were incubated for 15 minutes on ice and cell membranes disrupted  
576 mechanically by syringing 5 times with 21G narrow gauge needle and sonicating  
577 at 3Å~ for 2 seconds at high power. Lysates were incubated on ice for another  
578 15 minutes and cleared by centrifugation at 20,000 (RCF) at 4°C for 30 minutes.  
579 To harvest the nuclear fraction, lysates were resuspended in an equal volume of  
580 Nuclear Buffer (20mm HEPES pH 7.9, 0.2mm EDTA, 1.5mm MgCl<sub>2</sub>, 20% glycerol,  
581 420mm NaCl, 2µg/ml Aprotinin, 1µg/ml Leupeptin, 10mm PMSF) and dounced  
582 20 times with tight pestle type B. Lysates were incubated for 45 minutes rotating  
583 to dissociated chromatin-bound proteins and precleared by centrifugation at  
584 20,000 (RCF) 4°C for 30 minutes.

585

### 586 Immunoprecipitation

587 Immunoprecipitations (IPs) were performed on nuclear protein lysates prepared  
588 in Nuclear Buffer (prepared as described above). 10µg of antibody was coupled  
589 to 50µl packed Protein A beads (Sigma P9424) by incubation in 1ml PBS (0.1%  
590 Tween-20) at 4°C rotating overnight. Beads were collected by centrifugation at

591 1700 × g for 3 minutes and washed twice in 1ml 0.2 m sodium borate pH 9.0.  
592 Antibodies were then crosslinked to beads by incubation in 1 ml 0.2 m sodium  
593 borate pH 9.0 (20mm dimethyl pimelimidate dihydrochloride) at room  
594 temperature rotating for 30 minutes. The reaction was terminated by washing  
595 the beads once in 1ml 0.2M ethanolamine pH 8.0 and incubating for 2 hours at  
596 room temperature rotating in 1ml 0.2m ethanolamine pH 8.0. Beads were  
597 washed twice in Buffer C100 (20mm HEPES pH 7.6, 0.2mm EDTA, 1.5mm MgCl<sub>2</sub>,  
598 100mm KCl, 0.5% Nonidet P-40, 20% glycerol) and blocked for 1 hour 4 °C  
599 rotating in Buffer C100 with 0.1mg/ml insulin (Sigma, I9278), 0.2mg/ml chicken  
600 egg albumin (Sigma A5503), 0.1% (v/v) fish skin gelatin (Sigma G7041).  
601 Antibody-crosslinked beads were incubated with nuclear lysates, in the presence  
602 of 250U/ml Benzonase nuclease, at 4°C rotating overnight and washed 5 × 5  
603 minutes in Buffer C100 with 0.02% Nonidet P-40. After the final wash, beads  
604 destined for immunoblotting were resuspended in 50µl 2× SDS sample buffer.  
605 Immunoprecipitated material was eluted by boiling for 5 minutes with shaking,  
606 and associated proteins were separated by SDS-PAGE and analyzed by  
607 immunoblotting. Beads destined for mass spectrometry analysis were washed  
608 once in IP buffer containing 0.02% Nonidet P-40 followed by one wash in IP  
609 buffer with no detergent.

610

611

#### 612 Mass spectrometry analysis

613 Proteins were treated with trypsin as described (86). Samples were redissolved  
614 in 50 µl of Trifluoroacetic acid 0.1% (vol/vol) in water, as buffer A, and sonicated  
615 for 1 minute and centrifuged for 15 minutes at 15000 × g. Analysis was carried  
616 out on an Ultimate 3000 RSLCnano HPLC system connected to a mass accuracy  
617 high resolution mass spectrometry, Q Exactive (ThermoFisher). The MS  
618 instrument was controlled by Xcalibur software (ThermoFisher).

619 Each sample was loaded onto a 75 µm x 15 cm C18 column (particle diameter 1.8  
620 µm, pore size 120 Å) and was separated by an increasing acetonitrile gradient  
621 over 100 minutes at a flow rate of 200 nL/min.

622 MS analysis was done in DDA mode: parent ion spectra (MS1) were measured at  
623 resolution 60,000, AGC target 3e6. Tandem mass spectra (MS2; up to 20 scans

624 per duty cycle) were obtained at resolution 15,000, AGC target 2e5 and collision  
625 energy of 27.

626

#### 627 Data processing

628 Data were processed using MaxQuant version MaxQuant version 1.4.3.22 (88)  
629 using the human UniProt database (Taxon identifier 9606, Proteome ID  
630 UP000005640, Protein Reviewed 20,380). The following search parameters  
631 were used: Fixed Mod: carbamidomethylation; Variable Mods: methionine,  
632 oxidation; Trypsin/P digest enzyme (maximum 2 missed cleavages); Precursor  
633 mass tolerances 6 ppm; Fragment ion mass tolerances 20ppm; Peptide FDR 1%;  
634 Protein FDR 1%.

635 “Label-Free Quantitation; LFQ,” “iBAQ,” and “Match Between Run” settings were  
636 selected. Reverse hits and contaminants retrieve from the cRAP database  
637 (<https://www.thegpm.org/crap/>) (89) were filtered out and not considered  
638 further.

639

#### 640 Data and Statistical Analysis

641 Bioinformatic analysis of the MaxQuant output files and data visualization was  
642 performed with Perseus software version 1.4 (90) and RStudio employing the  
643 following packages: ggplot2 and ggrepel, and clusterProfiler. LFQ values were  
644 extracted from the protein group table. No additional normalization steps were  
645 performed, as the resulting LFQ intensities are normalized by the MaxLFQ  
646 procedure (42).

647

648 In Perseus software, the LFQ values were transformed (log<sub>2</sub>) and a protein was  
649 considered quantified only if it was detected at least two out of three biological  
650 replicates. Missing values imputation was carried out from a normal distribution  
651 (width: 0.3, downshift: 1.8), and a two-tailed t test applied with correction for  
652 multiple testing (Benjamini). Volcano plots were constructed using the  
653 permutation-based FDR (1%) approach (90) (91), and set the significant  
654 differences in the protein abundance ( $\geq 1.5$ -fold change).

655

656 Gene ontology analysis was performed using the ‘enrichGO’ function of the  
657 clusterProfiler R and Bioconductor package with parameters ‘pAdjustMethod =  
658 ‘BH’, ont = ‘BP’, qvalueCutoff = 0.05) (92). Protein alignment was performed  
659 using Clustal-Omega with default settings  
660 (<https://www.ebi.ac.uk/Tools/msa/clustalo/>) (93)

661

662

### 663 Immunoblotting

664 Protein lysate was quantified using by the Bradford assay. Subsequently protein  
665 lysates were separated on SDS-PAGE gels and transferred to nitrocellulose  
666 membranes. Membranes were blocked with 5% non-fat milk or 5% BSA at room  
667 temperature for 1 hour and incubated overnight with diluted primary antibody  
668 at 4°C. Membranes were then washed and incubated with HRP-conjugated goat-  
669 anti-rabbit or mouse IgG secondary antibody for 1 hour at room temperature.  
670 Membrane was incubated with enhanced chemiluminescence reagents (Thermo  
671 Scientific) followed by exposure to X-ray films. Immunoblotting was performed  
672 using the antibodies and conditions listed in Supplementary material XXX.

673

### 674 Gel filtration column chromatography

675 The Superose™ 6 10/300 GL gel filtration column (GE Healthcare) was  
676 equilibrated with one column volume of running buffer (20mM Tris pH 8.0, 10%  
677 Glycerol, 175mM NaCl, 0.5mM DTT, 1mM PMSF). 300-500µg of total nuclear  
678 protein (prepared as described above) was injected and run through column at  
679 0.35mL/min. 1mL fractions were collected and protein was concentrated by  
680 incubation with 4µL StrataClean resin (Agilent Technologies) for 1 hour at room  
681 temperature. Resin was collected by centrifugation at 5000rpm for 3 minutes  
682 and protein was eluted by boiling in 20µL 2X SDS sample buffer for 5 minutes  
683 shaking at 3000 (RCF). Eluted protein analyzed by SDS-PAGE and  
684 immunoblotting

685

### 686 Real-time Quantitative PCR

687 Extracted RNA was used to generate cDNA by reverse transcriptase PCR using  
688 the TaqMan Reverse Transcription kit (Applied Biosystems). Relative mRNA



689 expression levels were determined using the SYBR Green I detection chemistry  
690 on LightCycler 480II Real-Time PCR System (Roche). The ribosomal constituent  
691 RPO was used as normalizing gene. The primers used are listed in supplemental  
692 material.

693

#### 694 Cell Viability Assay

695 NT2 cells were seeded into the 12-well plate in Dulbecco's Modified Eagle  
696 Medium (DMEM) supplemented with 10% (v/v) Fetal Bovine Serum (Hyclone),  
697 100U/ml penicillin and 100U/ml streptomycin (Gibco).

698 Lentivirus-infected NT2 were subjected to crystal violet staining using 0.1%  
699 crystal violet (CV). After staining, plate wells were subsequently washed with  
700 phosphate buffered saline (pH = 7.4) to remove the unbound crystal violet and  
701 residual NT2 cells. The plates were then air dried at room temperature and 95%  
702 ethanol was added to the wells to resuspend the adhered stained cells. The  
703 ethanol bound crystal violet stain of adhered cells were quantified by measured  
704 at 590nm in the spectrophotometer.

705

706

707

708 **REFERENCE**

- 709 1. Klemm, S. L., Shipony, Z., and Greenleaf, W. J. (2019) Chromatin  
710 accessibility and the regulatory epigenome. *Nat. Rev. Genet.* 2018 204 20,  
711 207–220
- 712 2. Goldberg, A. D., Allis, C. D., and Bernstein, E. (2007) Epigenetics: A  
713 Landscape Takes Shape. *Cell* 128, 635–638
- 714 3. Golbabapour, S., Majid, N. A., Hassandarvish, P., Hajrezaie, M., Abdulla, M.  
715 A., and Hadi, A. H. A. (2013) Gene silencing and polycomb group proteins:  
716 An overview of their structure, mechanisms and phylogenetics. *Omi. A J.*  
717 *Integr. Biol.* 17, 283–296
- 718 4. Entrevan, M., Schuettengruber, B., and Cavalli, G. (2016) Regulation of  
719 Genome Architecture and Function by Polycomb Proteins. *Trends Cell Biol.*  
720 26, 511–525
- 721 5. Blackledge, N. P., Rose, N. R., and Klose, R. J. (2015) Targeting Polycomb  
722 systems to regulate gene expression: Modifications to a complex story.  
723 *Nat. Rev. Mol. Cell Biol.* 16, 643–649
- 724 6. Di Croce, L., and Helin, K. (2013) Transcriptional regulation by Polycomb  
725 group proteins. *Nat. Struct. Mol. Biol.* 20, 1147–55
- 726 7. Aloia, L., Di Stefano, B., and Di Croce, L. (2013) Polycomb complexes in  
727 stem cells and embryonic development. *Dev.* 140, 2525–2534
- 728 8. Conway, E. M., and Bracken, A. P. (2017) in *Polycomb Group Proteins*  
729 (Elsevier Inc.), pp 57–80.
- 730 9. Piunti, A., and Shilatifard, A. (2021) The roles of Polycomb repressive  
731 complexes in mammalian development and cancer. *Nat. Rev. Mol. Cell Biol.*,  
732 1–20
- 733 10. Rodríguez-Paredes, M., and Lyko, F. (2019) The importance of non-histone  
734 protein methylation in cancer therapy. *Nat. Rev. Mol. Cell Biol.* 2019 2010  
735 20, 569–570
- 736 11. Margueron, R., and Reinberg, D. (2011) The Polycomb complex PRC2 and  
737 its mark in life. *Nature* 469, 343–9
- 738 12. van Mierlo, G., Veenstra, G. J. C., Vermeulen, M., and Marks, H. (2019) The  
739 Complexity of PRC2 Subcomplexes. *Trends Cell Biol.* 29, 660–671
- 740 13. Zhang, Q., Agius, S. C., Flanigan, S. F., Uckelmann, M., Levina, V., Owen, B. M.,  
741 and Davidovich, C. (2021) PALI1 facilitates DNA and nucleosome binding  
742 by PRC2 and triggers an allosteric activation of catalysis. *Nat. Commun.*  
743 2021 121 12, 1–18
- 744 14. Conway, E., Jerman, E., Healy, E., Ito, S., Holloch, D., Oliviero, G., Deevy, O.,  
745 Glancy, E., Fitzpatrick, D. J., Mucha, M., Watson, A., Rice, A. M., Chammas, P.,  
746 Huang, C., Pratt-Kelly, I., Koseki, Y., Nakayama, M., Ishikura, T., Streubel, G.,  
747 Wynne, K., Hokamp, K., McLysaght, A., Ciferri, C., Di Croce, L., Cagney, G.,  
748 Margueron, R., Koseki, H., and Bracken, A. P. (2018) A Family of  
749 Vertebrate-Specific Polycombs Encoded by the LCOR/LCORL Genes  
750 Balance PRC2 Subtype Activities. *Mol. Cell* 70, 408–421.e8
- 751 15. Scelfo, A., Fernández-Pérez, D., Tamburri, S., Bonaldi, T., Ferrari, K. J., and  
752 Correspondence, D. P. (2019) Functional Landscape of PGC Proteins  
753 Reveals Both RING1A/B-Dependent-and RING1A/B-Independent-Specific  
754 Activities *Mol. Cell* 74,
- 755 16. Coleman, R. T., and Struhl, G. (2017) Causal role for inheritance of  
756 H3K27me3 in maintaining the off state of a Drosophila HOX gene. *Science*

- 757 (80- ). 356,  
758 17. He, J., Shen, L., Wan, M., Taranova, O., Wu, H., and Zhang, Y. (2013) Kdm2b  
759 maintains murine embryonic stem cell status by recruiting PRC1 complex  
760 to CpG islands of developmental genes. *Nat. Cell Biol.* 15, 373–84  
761 18. Blackledge, N. P., Farcas, A. M., Kondo, T., King, H. W., McGouran, J. F.,  
762 Hanssen, L. L. P., Ito, S., Cooper, S., Kondo, K., Koseki, Y., Ishikura, T., Long,  
763 H. K., Sheahan, T. W., Brockdorff, N., Kessler, B. M., Koseki, H., and Klose, R.  
764 J. (2014) Variant PRC1 complex-dependent H2A ubiquitylation drives  
765 PRC2 recruitment and polycomb domain formation. *Cell* 157, 1445–1459  
766 19. Wu, X., Johansen, J. V., and Helin, K. (2013) Fbxl10/Kdm2b recruits  
767 polycomb repressive complex 1 to CpG islands and regulates H2A  
768 ubiquitylation. *Mol. Cell* 49, 1134–46  
769 20. Chamberlain, S. J., Yee, D., and Magnuson, T. (2008) Polycomb repressive  
770 complex 2 is dispensable for maintenance of embryonic stem cell  
771 pluripotency. *Stem Cells* 26, 1496–505  
772 21. Walker, E., Chang, W. Y., Hunkapiller, J., Cagney, G., Garcha, K., Torchia, J.,  
773 Krogan, N. J., Reiter, J. F., and Stanford, W. L. (2010) Polycomb-like 2  
774 Associates with PRC2 and Regulates Transcriptional Networks during  
775 Mouse Embryonic Stem Cell Self-Renewal and Differentiation. *Cell Stem*  
776 *Cell* 6, 153–166  
777 22. Bracken, A. P., and Helin, K. (2009) Polycomb group proteins: navigators of  
778 lineage pathways led astray in cancer. *Nat. Rev. Cancer* 9, 773–84  
779 23. Sauvageau, M., and Sauvageau, G. (2010) Polycomb group proteins: multi-  
780 faceted regulators of somatic stem cells and cancer. *Cell Stem Cell* 7, 299–  
781 313  
782 24. Takahashi, S., Kobayashi, S., and Hiratani, I. (2018) Epigenetic differences  
783 between naïve and primed pluripotent stem cells. *Cell. Mol. Life Sci.* 75,  
784 1191–1203  
785 25. Boyer, L. A., Plath, K., Zeitlinger, J., Brambrink, T., Medeiros, L. A., Lee, T. I.,  
786 Levine, S. S., Wernig, M., Tajonar, A., Ray, M. K., Bell, G. W., Otte, A. P., Vidal,  
787 M., Gifford, D. K., Young, R. A., and Jaenisch, R. (2006) Polycomb complexes  
788 repress developmental regulators in murine embryonic stem cells. *Nature*  
789 441, 349–53  
790 26. Abolpour Mofrad, S., Kuenzel, K., Friedrich, O., and Gilbert, D. F. (2016)  
791 Optimizing neuronal differentiation of human pluripotent NT2 stem cells  
792 in monolayer cultures. *Dev. Growth Differ.* 58, 664–676  
793 27. Tegenge, M. A., Roloff, F., and Bicker, G. (2011) Rapid differentiation of  
794 human embryonal carcinoma stem cells (NT2) into neurons for neurite  
795 outgrowth analysis. *Cell. Mol. Neurobiol.* 31, 635–643  
796 28. Stern, M., Gierse, A., Tan, S., and Bicker, G. (2014) Human Ntera2 cells as a  
797 predictive in vitro test system for developmental neurotoxicity. *Arch.*  
798 *Toxicol.* 88, 127–136  
799 29. Guillemain, I., Alonso, G., Patey, G., Privat, A., and Chaudieu, I. (2000)  
800 Human NT2 neurons express a large variety of neurotransmission  
801 phenotypes in vitro. *J. Comp. Neurol.* 422, 380–395  
802 30. Haile, Y., Fu, W., Shi, B., Westaway, D., Baker, G., Jhamandas, J., and Giuliani,  
803 F. (2014) Characterization of the NT2-derived neuronal and astrocytic cell  
804 lines as alternative in vitro models for primary human neurons and  
805 astrocytes. *J. Neurosci. Res.* 92, 1187–1198

- 806 31. Langlois, A., and Duval, D. (1997) Differentiation of the human NT2 cells  
807 into neurons and glia. *Methods Cell Sci.* 19, 213–219
- 808 32. Oliviero, G., Munawar, N., Watson, A., Streubel, G., Manning, G., Bardwell, V.,  
809 Bracken, A. P., and Cagney, G. (2015) The variant Polycomb Repressor  
810 Complex 1 component PCGF1 interacts with a pluripotency sub-network  
811 that includes DPPA4, a regulator of embryogenesis. *Sci. Rep.* 5, 18388
- 812 33. Krogan, N. J., Cagney, G., Yu, H., Zhong, G., Guo, X., Ignatchenko, A., Li, J., Pu,  
813 S., Datta, N., Tikuisis, A. P., Punna, T., Peregrín-Alvarez, J. M., Shales, M.,  
814 Zhang, X., Davey, M., Robinson, M. D., Paccanaro, A., Bray, J. E., Sheung, A.,  
815 Beattie, B., Richards, D. P., Canadien, V., Lalev, A., Mena, F., Wong, P.,  
816 Starostine, A., Canete, M. M., Vlasblom, J., Wu, S., Orsi, C., Collins, S. R.,  
817 Chandran, S., Haw, R., Rilstone, J. J., Gandi, K., Thompson, N. J., Musso, G., St  
818 Onge, P., Ghanny, S., Lam, M. H. Y., Butland, G., Altaf-Ul, A. M., Kanaya, S.,  
819 Shilatifard, A., O’Shea, E., Weissman, J. S., Ingles, C. J., Hughes, T. R.,  
820 Parkinson, J., Gerstein, M., Wodak, S. J., Emili, A., and Greenblatt, J. F. (2006)  
821 Global landscape of protein complexes in the yeast *Saccharomyces*  
822 *cerevisiae*. *Nat.* 2006 4407084 440, 637–643
- 823 34. Gavin, A.-C., Aloy, P., Grandi, P., Krause, R., Boesche, M., Marzioch, M., Rau,  
824 C., Jensen, L. J., Bastuck, S., Dümpelfeld, B., Edelmann, A., Heurtier, M.-A.,  
825 Hoffman, V., Hoefert, C., Klein, K., Hudak, M., Michon, A.-M., Schelder, M.,  
826 Schirle, M., Remor, M., Rudi, T., Hooper, S., Bauer, A., Bouwmeester, T.,  
827 Casari, G., Drewes, G., Neubauer, G., Rick, J. M., Kuster, B., Bork, P., Russell,  
828 R. B., and Superti-Furga, G. (2006) Proteome survey reveals modularity of  
829 the yeast cell machinery. *Nat.* 2006 4407084 440, 631–636
- 830 35. Tyanova, S., Temu, T., Carlson, A., Sinitcyn, P., Mann, M., and Cox, J. (2015)  
831 Visualization of LC-MS/MS proteomics data in MaxQuant. *Proteomics* 15,  
832 1453–1456
- 833 36. Sanchez-Pulido, L., Devos, D., Sung, Z. R., and Calonje, M. (2008) RAWUL: A  
834 new ubiquitin-like domain in PRC1 Ring finger proteins that unveils  
835 putative plant and worm PRC1 orthologs. *BMC Genomics* 9, 308
- 836 37. Chittock, E. C., Latwiel, S., Miller, T. C. R., and Müller, C. W. (2017)  
837 Molecular architecture of polycomb repressive complexes. *Biochem. Soc.*  
838 *Trans.* 45, 193–205
- 839 38. Junco, S. E., Wang, R., Gaipa, J. C., Taylor, A. B., Schirf, V., Gearhart, M. D.,  
840 Bardwell, V. J., Demeler, B., Hart, P. J., and Kim, C. A. (2013) Structure of the  
841 polycomb group protein PCGF1 in complex with BCOR reveals basis for  
842 binding selectivity of PCGF homologs. *Structure* 21, 665–671
- 843 39. Thompson, J. D. (2005) in *The Proteomics Protocols Handbook* (Humana  
844 Press, Totowa, NJ), pp 493–502.
- 845 40. Gray, F., Cho, H. J., Shukla, S., He, S., Harris, A., Boytsov, B., Jaremko, Ł.,  
846 Jaremko, M., Demeler, B., Lawlor, E. R., Grembecka, J., and Cierpicki, T.  
847 (2016) BMI1 regulates PRC1 architecture and activity through homo- and  
848 hetero-oligomerization. *Nat. Commun.* 2016 71 7, 1–12
- 849 41. Turnpenny, P. D., Wright, M. J., Sloman, M., Caswell, R., van Essen, A. J.,  
850 Gerkes, E., Pfundt, R., White, S. M., Shaul-Lotan, N., Carpenter, L., Schaefer,  
851 G. B., Fryer, A., Innes, A. M., Forbes, K. P., Chung, W. K., McLaughlin, H.,  
852 Henderson, L. B., Roberts, A. E., Heath, K. E., Paumard-Hernández, B.,  
853 Gener, B., Fawcett, K. A., Gjergja-Juraški, R., Pilz, D. T., and Fry, A. E. (2018)  
854 Missense Mutations of the Pro65 Residue of PCGF2 Cause a Recognizable

- 855 Syndrome Associated with Craniofacial, Neurological, Cardiovascular, and  
856 Skeletal Features. *Am. J. Hum. Genet.* 103, 786–793
- 857 42. Cox, J., Hein, M. Y., Lubner, C. A., Paron, I., Nagaraj, N., and Mann, M. (2014)  
858 Accurate Proteome-wide Label-free Quantification by Delayed  
859 Normalization and Maximal Peptide Ratio Extraction, Termed MaxLFQ.  
860 *Mol. Cell. Proteomics* 13, 2513
- 861 43. de Napoles, M., Mermoud, J. E., Wakao, R., Tang, Y. A., Endoh, M., Appanah,  
862 R., Nesterova, T. B., Silva, J., Otte, A. P., Vidal, M., Koseki, H., and Brockdorff,  
863 N. (2004) Polycomb group proteins ring1A/B link ubiquitylation of histone  
864 H2A to heritable gene silencing and X inactivation. *Dev. Cell* 7, 663–676
- 865 44. Wang, H., Wang, L., Erdjument-Bromage, H., Vidal, M., Tempst, P., Jones, R.  
866 S., and Zhang, Y. (2004) Role of histone H2A ubiquitination in Polycomb  
867 silencing. *Nat.* 2004 4317010 431, 873–878
- 868 45. Gao, Z., Zhang, J., Bonasio, R., Strino, F., Sawai, A., Parisi, F., Kluger, Y., and  
869 Reinberg, D. (2012) PCGF Homologs, CBX Proteins, and RYBP Define  
870 Functionally Distinct PRC1 Family Complexes. *Mol. Cell* 45, 344–356
- 871 46. Hauri, S., Comoglio, F., Seimiya, M., Gerstung, M., Glatter, T., Hansen, K.,  
872 Aebersold, R., Paro, R., Gstaiger, M., and Beisel, C. (2016) A High-Density  
873 Map for Navigating the Human Polycomb Complexome. *Cell Rep.* 17, 583–  
874 595
- 875 47. Wiederschain, D., Chen, L., Johnson, B., Bettano, K., Jackson, D., Taraszka, J.,  
876 Wang, Y. K., Jones, M. D., Morrissey, M., Deeds, J., Mosher, R., Fordjour, P.,  
877 Lengauer, C., and Benson, J. D. (2007) Contribution of Polycomb  
878 Homologues Bmi-1 and Mel-18 to Medulloblastoma Pathogenesis. *Mol.*  
879 *Cell. Biol.* 27, 4968
- 880 48. Morey, L., Santanach, A., Blanco, E., Aloia, L., Nora, E. P., Bruneau, B. G., and  
881 Di croce, L. (2015) Polycomb Regulates Mesoderm Cell Fate-Specification  
882 in Embryonic Stem Cells through Activation and Repression Mechanisms.  
883 *Cell Stem Cell* 17, 300–315
- 884 49. Medvedeva, Y. A., Lennartsson, A., Ehsani, R., Kulakovskiy, I. V., Vorontsov,  
885 I. E., Panahandeh, P., Khimulya, G., Kasukawa, T., and Drabløs, F. (2015)  
886 EpiFactors: A comprehensive database of human epigenetic factors and  
887 complexes. *Database* 2015, 1–10
- 888 50. Xu, Y., Zhang, S., Lin, S., Guo, Y., Deng, W., Zhang, Y., and Xue, Y. (2017)  
889 WERAM: a database of writers, erasers and readers of histone acetylation  
890 and methylation in eukaryotes. *Nucleic Acids Res.* 45, D264
- 891 51. Oliviero, G., Kovalchuk, S., Rogowska-Wrzesinska, A., Schwämmle, V., and  
892 Jensen, O. N. (2022) Distinct and diverse chromatin proteomes of ageing  
893 mouse organs reveal protein signatures that correlate with physiological  
894 functions. *Elife* 11,
- 895 52. Albert, T. K., Hanzawa, H., Legtenberg, Y. I. A., Ruwe, M. J. de, Heuvel, F. A. J.  
896 van den, Collart, M. A., Boelens, R., and Timmers, H. T. M. (2002)  
897 Identification of a ubiquitin–protein ligase subunit within the CCR4–NOT  
898 transcription repressor complex. *EMBO J.* 21, 355
- 899 53. Vissers, L. E. L. M., Kalvakuri, S., de Boer, E., Geuer, S., Oud, M., van  
900 Outersterp, I., Kwint, M., Witmond, M., Kersten, S., Polla, D. L., Weijers, D.,  
901 Begtrup, A., McWalter, K., Ruiz, A., Gabau, E., Morton, J. E. V., Griffith, C.,  
902 Weiss, K., Gamble, C., Bartley, J., Vernon, H. J., Brunet, K., Ruivenkamp, C.,  
903 Kant, S. G., Kruszka, P., Larson, A., Afenjar, A., Billette de Villemeur, T.,



- 904 Nugent, K., Raymond, F. L., Venselaar, H., Demurger, F., Soler-Alfonso, C., Li,  
905 D., Bhoj, E., Hayes, I., Hamilton, N. P., Ahmad, A., Fisher, R., van den Born,  
906 M., Willems, M., Sorlin, A., Delanne, J., Moutton, S., Christophe, P., Mau-  
907 Them, F. T., Vitobello, A., Goel, H., Massingham, L., Phornphutkul, C.,  
908 Schwab, J., Keren, B., Charles, P., Vreeburg, M., De Simone, L., Hoganson, G.,  
909 Iascone, M., Milani, D., Evenepoel, L., Revencu, N., Ward, D. I., Burns, K.,  
910 Krantz, I., Raible, S. E., Murrell, J. R., Wood, K., Cho, M. T., van Bokhoven, H.,  
911 Muenke, M., Kleefstra, T., Bodmer, R., and de Brouwer, A. P. M. (2020) De  
912 Novo Variants in CNOT1, a Central Component of the CCR4-NOT Complex  
913 Involved in Gene Expression and RNA and Protein Stability, Cause  
914 Neurodevelopmental Delay. *Am. J. Hum. Genet.* 107, 164–172
- 915 54. Gibbons, R. J., McDowell, T. L., Raman, S., O'Rourke, D. M., Garrick, D.,  
916 Ayyub, H., and Higgs, D. R. (2000) Mutations in ATRX, encoding a  
917 SWI/SNF-like protein, cause diverse changes in the pattern of DNA  
918 methylation. *Nat. Genet.* 2000 244 24, 368–371
- 919 55. Sokpor, G., Xie, Y., Rosenbusch, J., and Tuoc, T. (2017) Chromatin  
920 remodeling BAF (SWI/SNF) complexes in neural development and  
921 disorders. *Front. Mol. Neurosci.* 10, 243
- 922 56. Smits, A. H., Jansen, P. W. T. C., Poser, I., Hyman, A. A., and Vermeulen, M.  
923 (2013) Stoichiometry of chromatin-associated protein complexes revealed  
924 by label-free quantitative mass spectrometry-based proteomics. *Nucleic  
925 Acids Res.* 41, e28
- 926 57. Taherbhoy, A. M., Huang, O. W., and Cochran, A. G. (2015) BMI1–RING1B is  
927 an autoinhibited RING E3 ubiquitin ligase. *Nat. Commun.* 2015 61 6, 1–13
- 928 58. Akasaka, T., van Lohuizen, M., van der Lugt, N., Mizutani-Koseki, Y., Kanno,  
929 M., Taniguchi, M., Vidal, M., Alkema, M., Berns, A., and Koseki, H. (2001)  
930 Mice doubly deficient for the polycomb group genes *Mel18* and *Bmi1*  
931 reveal synergy and requirement for maintenance but not initiation of *Hox*  
932 gene expression. *Development* 128, 1587–1597
- 933 59. Bracken, A. P., Kleine-Kohlbrecher, D., Dietrich, N., Pasini, D., Gargiulo, G.,  
934 Beekman, C., Theilgaard-Mönch, K., Minucci, S., Porse, B. T., Marine, J.-C.,  
935 Hansen, K. H., and Helin, K. (2007) The Polycomb group proteins bind  
936 throughout the *INK4A-ARF* locus and are disassociated in senescent cells.  
937 *Genes Dev.* 21, 525–30
- 938 60. Maertens, G. N., El Messaoudi-Aubert, S., Racek, T., Stock, J. K., Nicholls, J.,  
939 Rodriguez-Niedenführ, M., Gil, J., and Peters, G. (2009) Several distinct  
940 polycomb complexes regulate and co-localize on the *INK4a* tumor  
941 suppressor locus. *PLoS One* 4, e6380
- 942 61. Rayess, H., Wang, M. B., and Srivatsan, E. S. (2012) Cellular senescence and  
943 tumor suppressor gene *p16*. *Int. J. Cancer* 130, 1715
- 944 62. Liu, J.-Y., Souroullas, G. P., Diekman, B. O., Krishnamurthy, J., Hall, B. M.,  
945 Sorrentino, J. A., Parker, J. S., Sessions, G. A., Gudkov, A. V., and Sharpless, N.  
946 E. (2019) Cells exhibiting strong *p16INK4a* promoter activation in vivo  
947 display features of senescence. *Proc. Natl. Acad. Sci.* 116, 2603–2611
- 948 63. Scelfo, A., Piunti, A., and Pasini, D. (2015) The controversial role of the  
949 Polycomb group proteins in transcription and cancer: how much do we  
950 not understand Polycomb proteins? *FEBS J.* 282, 1703–1722
- 951 64. Tamburri, S., Conway, E., and Pasini, D. (2021) Polycomb-dependent  
952 histone H2A ubiquitination links developmental disorders with cancer.

- 953 *Trends Genet.*,  
954 65. Fursova, N. A., Blackledge, N. P., King, H. W., Koseki, H., and Klose  
955 Correspondence, R. J. (2019) Synergy between Variant PRC1 Complexes  
956 Defines Polycomb-Mediated Gene Repression In Brief.  
957 66. Bernstein, B. E., Mikkelsen, T. S., Xie, X., Kamal, M., Huebert, D. J., Cuff, J.,  
958 Fry, B., Meissner, A., Wernig, M., Plath, K., Jaenisch, R., Wagschal, A., Feil, R.,  
959 Schreiber, S. L., and Lander, E. S. (2006) A Bivalent Chromatin Structure  
960 Marks Key Developmental Genes in Embryonic Stem Cells. *Cell* 125, 315–  
961 326  
962 67. Gil, J., and O’Loughlen, A. (2014) PRC1 complex diversity: Where is it taking  
963 us? *Trends Cell Biol.* 24, 632–641  
964 68. Wu, X., Johansen, J. V., and Helin, K. (2013) Fbxl10/Kdm2b Recruits  
965 Polycomb Repressive Complex 1 to CpG Islands and Regulates H2A  
966 Ubiquitylation. *Mol. Cell* 49, 1134–1146  
967 69. Gearhart, M. D., Corcoran, C. M., Wamstad, J. A., and Bardwell, V. J. (2006)  
968 Polycomb group and SCF ubiquitin ligases are found in a novel BCOR  
969 complex that is recruited to BCL6 targets. *Mol. Cell Biol.* 26, 6880–9  
970 70. Conway, E., Healy, E., and Bracken, A. P. (2015) PRC2 mediated H3K27  
971 methylations in cellular identity and cancer. *Curr. Opin. Cell Biol.* 37, 42–48  
972 71. Bajusz, I., Kovács, G., and Pirity, M. K. (2018) From Flies to Mice: The  
973 Emerging Role of Non-Canonical PRC1 Members in Mammalian  
974 Development. *Epigenomes 2018, Vol. 2, Page 4 2, 4*  
975 72. Fan, Z., Yamaza, T., Lee, J. S., Yu, J., Wang, S., Fan, G., Shi, S., and Wang, C.-Y.  
976 (2009) BCOR regulates mesenchymal stem cell function by epigenetic  
977 mechanisms. *Nat. Cell Biol.* 11, 1002–9  
978 73. Huynh, K. D., Fischle, W., Verdin, E., and Bardwell, V. J. (2000) BCoR, a  
979 novel corepressor involved in BCL-6 repression. *Genes Dev.* 14, 1810  
980 74. Blackledge, N. P., Farcas, A. M., Kondo, T., King, H. W., McGouran, J. F.,  
981 Hanssen, L. L. P., Ito, S., Cooper, S., Kondo, K., Koseki, Y., Ishikura, T., Long,  
982 H. K., Sheahan, T. W., Brockdorff, N., Kessler, B. M., Koseki, H., and Klose, R.  
983 J. (2014) Variant PRC1 complex-dependent H2A ubiquitylation drives  
984 PRC2 recruitment and polycomb domain formation. *Cell* 157, 1445–1459  
985 75. Coulson, M., Robert, S., Eyre, H. J., and Saint, R. (1998) The identification  
986 and localization of a human gene with sequence similarity to Polycomblike  
987 of *Drosophila melanogaster*. *Genomics* 48, 381–3  
988 76. Mai, J., Peng, X.-D., Tang, J., Du, T., Chen, Y.-H., Wang, Z.-F., Zhang, H.-L.,  
989 Huang, J.-H., Zhong, Z.-Y., Yang, D., Li, Z.-L., Huang, Y., Feng, G.-K., Zhu, X.-F.,  
990 and Deng, R. (2021) AKT-mediated regulation of chromatin ubiquitylation  
991 and tumorigenesis through Mel18 phosphorylation. *Oncogene 2021 4013*  
992 40, 2422–2436  
993 77. Lee, J.-Y., Jang, K.-S., Shin, D.-H., Oh, M.-Y., Kim, H.-J., Kim, Y., and Kong, G.  
994 (2008) Mel-18 Negatively Regulates INK4a/ARF-Independent Cell Cycle  
995 Progression via Akt Inactivation in Breast Cancer. *Cancer Res.* 68, 4201–  
996 4209  
997 78. Jacobs, J. J., Scheijen, B., Voncken, J. W., Kieboom, K., Berns, A., and van  
998 Lohuizen, M. (1999) Bmi-1 collaborates with c-Myc in tumorigenesis by  
999 inhibiting c-Myc-induced apoptosis via INK4a/ARF. *Genes Dev.* 13, 2678–  
1000 90  
1001 79. Jacobs, J. J., Kieboom, K., Marino, S., DePinho, R. A., and van Lohuizen, M.



- 1002 (1999) The oncogene and Polycomb-group gene *bmi-1* regulates cell  
1003 proliferation and senescence through the *ink4a* locus. *Nature* 397, 164–8  
1004 80. Akasaka, T., Kanno, M., Balling, R., Mieza, M. A., Taniguchi, M., and Koseki,  
1005 H. (1996) A role for *mel-18*, a Polycomb group-related vertebrate gene,  
1006 during theanteroposterior specification of the axial skeleton. *Development*  
1007 122, 1513–22  
1008 81. Lessard, J., and Sauvageau, G. (2003) *Bmi-1* determines the proliferative  
1009 capacity of normal and leukaemic stem cells. *Nature* 423, 255–60  
1010 82. Bruggeman, S. W. M., Hulsman, D., Tanger, E., Buckle, T., Blom, M.,  
1011 Zevenhoven, J., van Tellingen, O., and van Lohuizen, M. (2007) *Bmi1*  
1012 Controls Tumor Development in an *Ink4a/Arf*-Independent Manner in a  
1013 Mouse Model for Glioma. *Cancer Cell* 12, 328–341  
1014 83. AV, M., R, P., T, I., IK, P., MF, C., and SJ, M. (2003) *Bmi-1* dependence  
1015 distinguishes neural stem cell self-renewal from progenitor proliferation.  
1016 *Nature* 425, 962–967  
1017 84. Xu, X., Song, Y., Li, Y., Chang, J., Zhang, H., and An, L. (2010) The tandem  
1018 affinity purification method: An efficient system for protein complex  
1019 purification and protein interaction identification. *Protein Expr. Purif.* 72,  
1020 149–156  
1021 85. Gavin, A.-C., Bösche, M., Krause, R., Grandi, P., Marzioch, M., Bauer, A.,  
1022 Schultz, J., Rick, J. M., Michon, A.-M., Cruciat, C.-M., Remor, M., Höfert, C.,  
1023 Schelder, M., Brajenovic, M., Ruffner, H., Merino, A., Klein, K., Hudak, M.,  
1024 Dickson, D., Rudi, T., Gnau, V., Bauch, A., Bastuck, S., Huhse, B., Leutwein, C.,  
1025 Heurtier, M.-A., Copley, R. R., Edelmann, A., Querfurth, E., Rybin, V., Drewes,  
1026 G., Raida, M., Bouwmeester, T., Bork, P., Seraphin, B., Kuster, B., Neubauer,  
1027 G., and Superti-Furga, G. (2002) Functional organization of the yeast  
1028 proteome by systematic analysis of protein complexes. *Nat.* 2002 4156868  
1029 415, 141–147  
1030 86. Lewis, E. B. (1978) A gene complex controlling segmentation in  
1031 *Drosophila*. *Nat.* 1978 2765688 276, 565–570  
1032 87. Ding, X., Lin, Q., Ensenat-Waser, R., Rose-John, S., and Zenke, M. (2011)  
1033 Polycomb Group Protein *Bmi1* Promotes Hematopoietic Cell Development  
1034 from Embryonic Stem Cells. <https://home.liebertpub.com/scd> 21, 121–132  
1035 88. Cox, J., and Mann, M. (2008) MaxQuant enables high peptide identification  
1036 rates, individualized p.p.b.-range mass accuracies and proteome-wide  
1037 protein quantification. *Nat. Biotechnol.* 26, 1367–1372  
1038 89. Mellacheruvu, D., Wright, Z., Couzens, A. L., Lambert, J.-P., St-Denis, N. A., Li,  
1039 T., Miteva, Y. V., Hauri, S., Sardi, M. E., Low, T. Y., Halim, V. A., Bagshaw, R.  
1040 D., Hubner, N. C., al-Hakim, A., Bouchard, A., Faubert, D., Fermin, D.,  
1041 Dunham, W. H., Goudreault, M., Lin, Z.-Y., Badillo, B. G., Pawson, T.,  
1042 Durocher, D., Coulombe, B., Aebersold, R., Superti-Furga, G., Colinge, J.,  
1043 Heck, A. J. R., Choi, H., Gstaiger, M., Mohammed, S., Cristea, I. M., Bennett, K.  
1044 L., Washburn, M. P., Raught, B., Ewing, R. M., Gingras, A.-C., and Nesvizhskii,  
1045 A. I. (2013) The CRAPome: a contaminant repository for affinity  
1046 purification–mass spectrometry data. *Nat. Methods* 2013 108 10, 730–736  
1047 90. Tyanova, S., Temu, T., Sinitcyn, P., Carlson, A., Hein, M. Y., Geiger, T., Mann,  
1048 M., and Cox, J. (2016) The Perseus computational platform for  
1049 comprehensive analysis of (prote)omics data. *Nat. Methods*,  
1050 91. Tusher, V. G., Tibshirani, R., and Chu, G. (2001) Significance analysis of

- 1051 microarrays applied to the ionizing radiation response. *Proc. Natl. Acad.*  
1052 *Sci. U. S. A.* 98, 5116–21
- 1053 92. Wu, T., Hu, E., Xu, S., Chen, M., Guo, P., Dai, Z., Feng, T., Zhou, L., Tang, W.,  
1054 Zhan, L., Fu, X., Liu, S., Bo, X., and Yu, G. (2021) clusterProfiler 4.0: A  
1055 universal enrichment tool for interpreting omics data. *Innov.* 2,  
1056 93. F, S., A, W., D, D., TJ, G., K, K., W, L., R, L., H, M., M, R., J, S., JD, T., and DG, H.  
1057 (2011) Fast, scalable generation of high-quality protein multiple sequence  
1058 alignments using Clustal Omega. *Mol. Syst. Biol.* 7,  
1059  
1060

1061

### Acknowledgements

1062 The research reported was supported by The Comprehensive Molecular  
1063 Analytical Platform (CMAP) under The SFI Research Infrastructure Programme,  
1064 reference 18/RI/5702.

1065

### Author Contributions

1067 G.O. Conceptualization, Investigation, Methodology, Visualization, Writing –  
1068 original draft, Writing – review and editing.

1069 K.W and NM. Methodology, Writing – review and editing.

1070

### Declaration of Interests

1072 The authors declare no competing interests.

1073

1074

1075

1076

1077

1078

1079

1080

### **Figure 1. A physical interaction screen for PRC1 components.**

1082 A: Four subunits of PRC1 subcomplexes were purified under endogenous conditions using  
1083 immunoprecipitation (IP). Physically interacting proteins were identified and quantified using  
1084 Orbitrap mass spectrometry.

1085 B: Amino acid homology between all six human PCGF proteins were compared using Clustal-  
1086 Omega.

1087 C: Sensitivity and reproducibility of biological replicate and individual IP experiments were  
1088 compared by plotting a matrix of pairwise Pearson correlation coefficients.

1089 D: The physical interactomes of each IP experiment (including biological–replicates) were  
1090 compared using Principal Component Analysis.

1091

1092 **Figure 2. AP-MS screening reveals common and distinct interactomes among PRC1**  
1093 **component proteins.**

1094 A: The specificity of the antibodies used in the PCGF1, PCGF2, and PCGF4 immunoprecipitations  
1095 were confirmed using western blotting. Positive (the cognate proteins, and the PRC1 core subunit  
1096 RING1A/RNF2) and isoform-specific proteins (BCOR) behaved as expected. Some overlap in  
1097 specificity between PCGF2 and PCGF4 was observed.

1098 B: The set of identified proteins for each immunoprecipitation experiment was projected onto  
1099 volcano plots to identify statistically robust hits.

1100 C: Venn diagram showing the range of overlap among the physical interactomes of PCGF1, PCGF2,  
1101 and PCGF4, as well as subsets uniquely identified for each bait.

1102

1103 **Figure 3. Stoichiometry and molecular mass of the isolated PRC1 complexes.**

1104 A: The stoichiometric contributions of individual subunits to each IP was estimated using  
1105 peptide signal intensity adjusted for protein size. Relative quantities were normalized to the  
1106 signal recorded for bait peptides.

1107 B: Nuclear lysates separated using gel filtration were run as fractions on SDS-PAGE and probed  
1108 using antibodies to PCGF1, PCGF2, PCGF4, and RING1A/RNF2.

1109

1110 **Figure 4. Functional enrichment of PCGF interactomes map to multiple pathways.**

1111 Gene Ontology (GO) analysis was used to identify enriched pathway components in the overall  
1112 (A) and individual PCGF interactomes (B). Categories are sorted by p-value (Spearman's Rank  
1113 Correlation Coefficient), while the dot size represents the number of proteins correspondent to  
1114 the source pathway.

1115

1116 **Figure 5. Functional enrichment of PCGF interactomes map to multiple pathways.**

1117 A: Western blotting was used to confirm successful partial knockdown of protein expression for  
1118 PCGF1, PCGF2, and PCGF4. Ubiquitination of histone H2A K119 was also reduced.

1119 B: Cell proliferation was quantified using the crystal violet assay.

1120 C: This assay allowed comparison of the kinetics for each knockdown, with PCGF4 showing a  
1121 more pronounced reduction of proliferation rate than PCGF1 or PCGF2.

1122 D: The INK4A-P16 marker of cellular senescence was selectively reduced by treatment with  
1123 PCGF4 but not PCGF1 shRNA.

1124 E: This latter result was confirmed by western blot.

1125

1126

1127

1128

**A**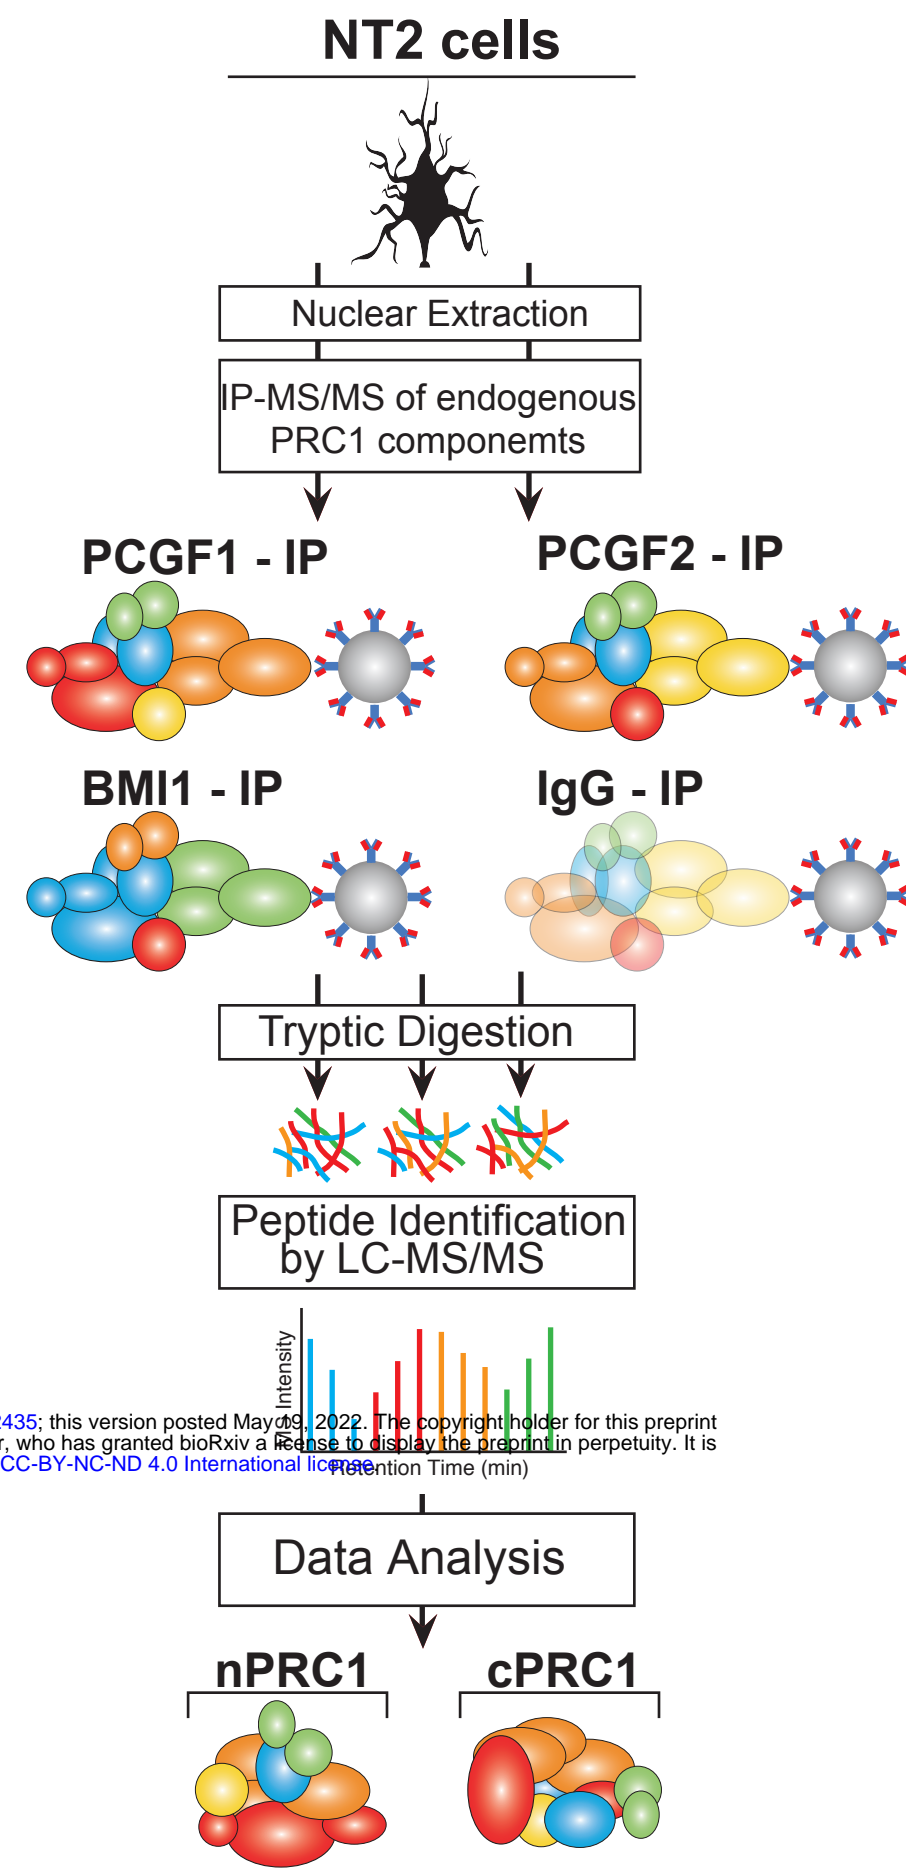

bioRxiv preprint doi: <https://doi.org/10.1101/2022.05.18.492435>; this version posted May 19, 2022. The copyright holder for this preprint (which was not certified by peer review) is the author/funder, who has granted bioRxiv a license to display the preprint in perpetuity. It is made available under aCC-BY-NC-ND 4.0 International license.

**B**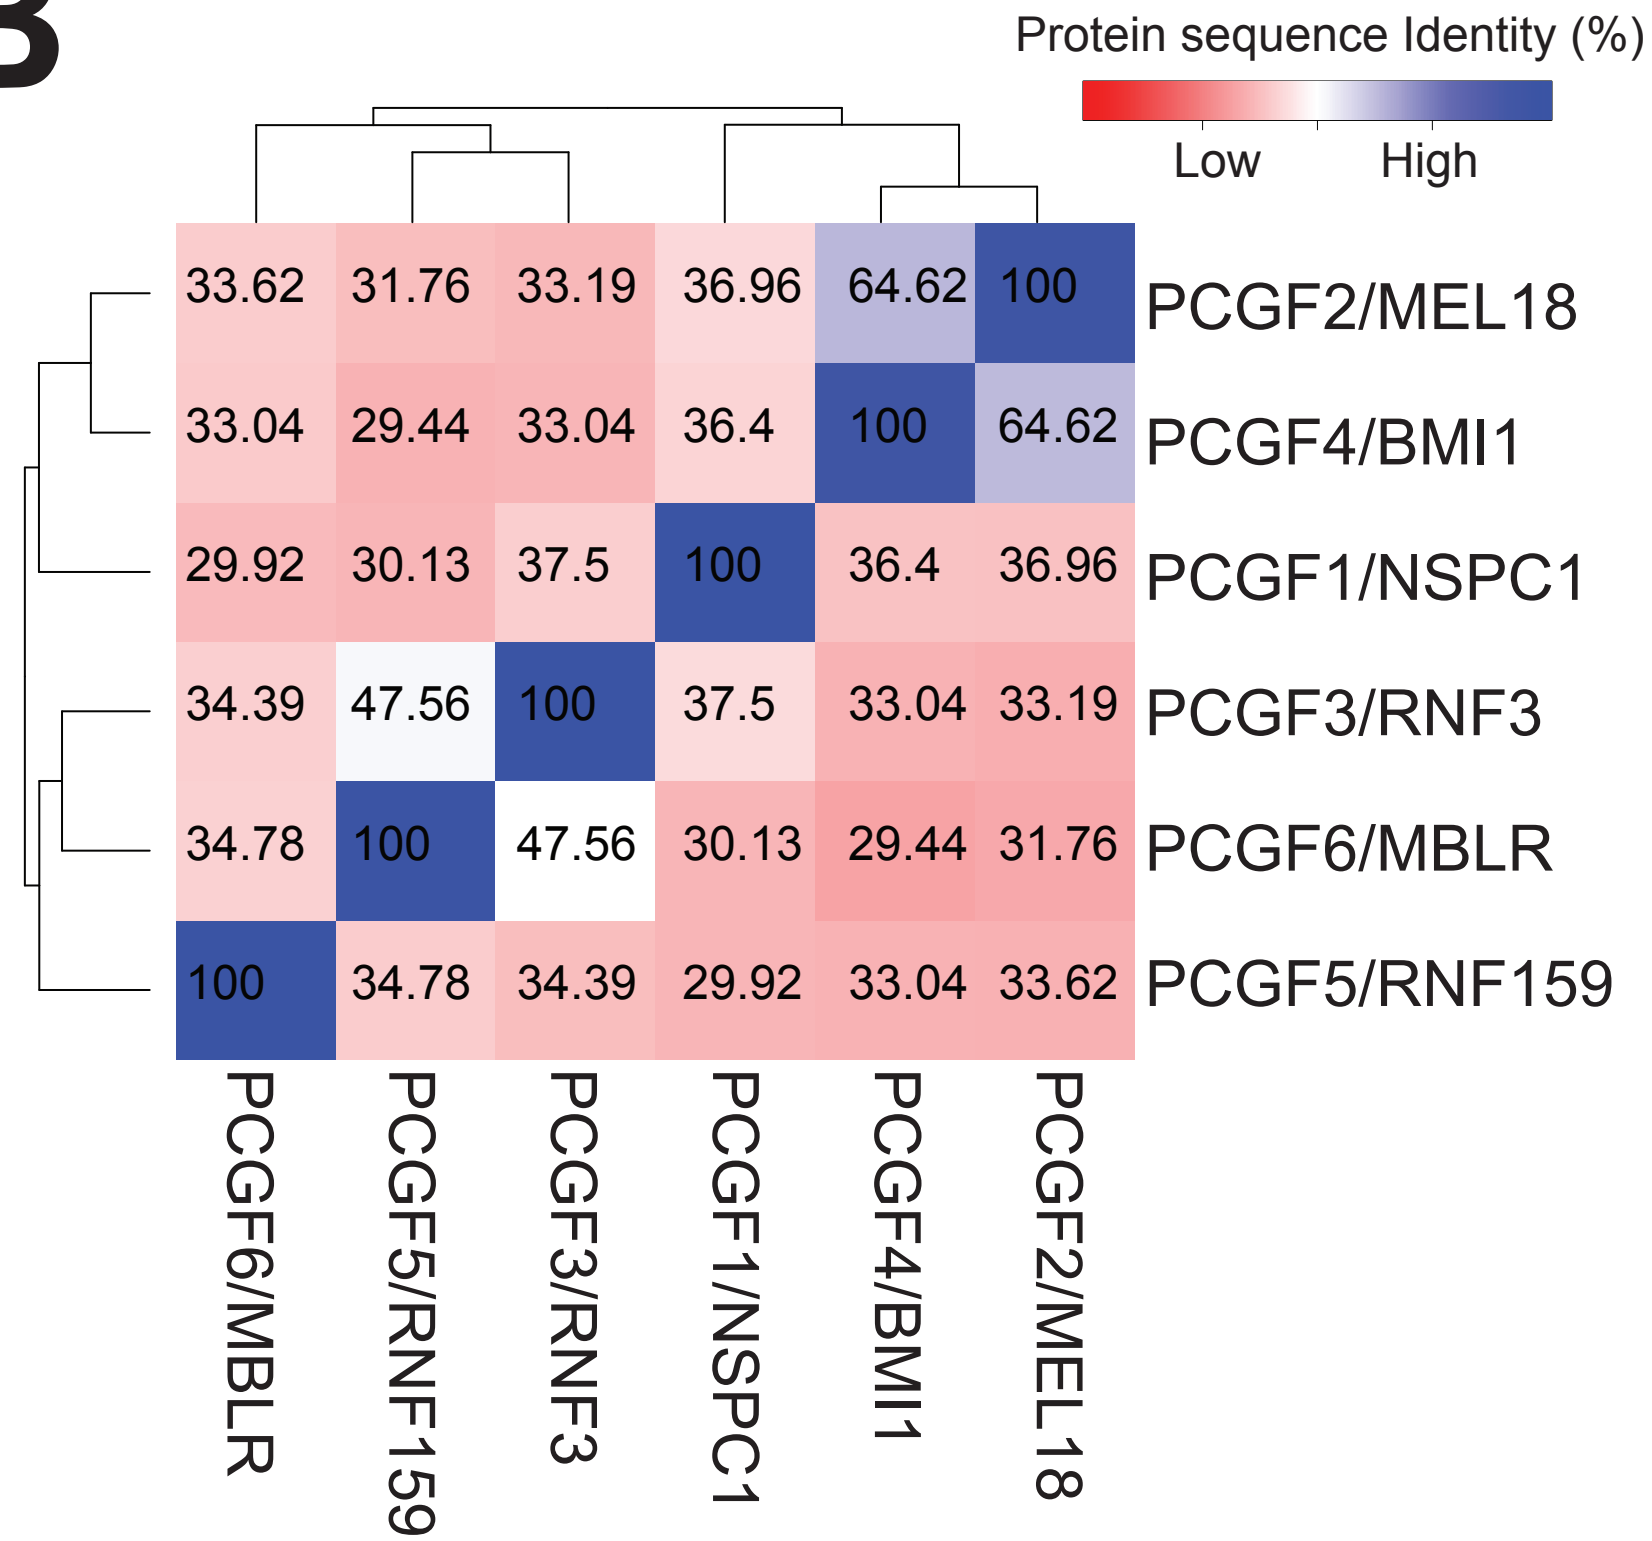**C**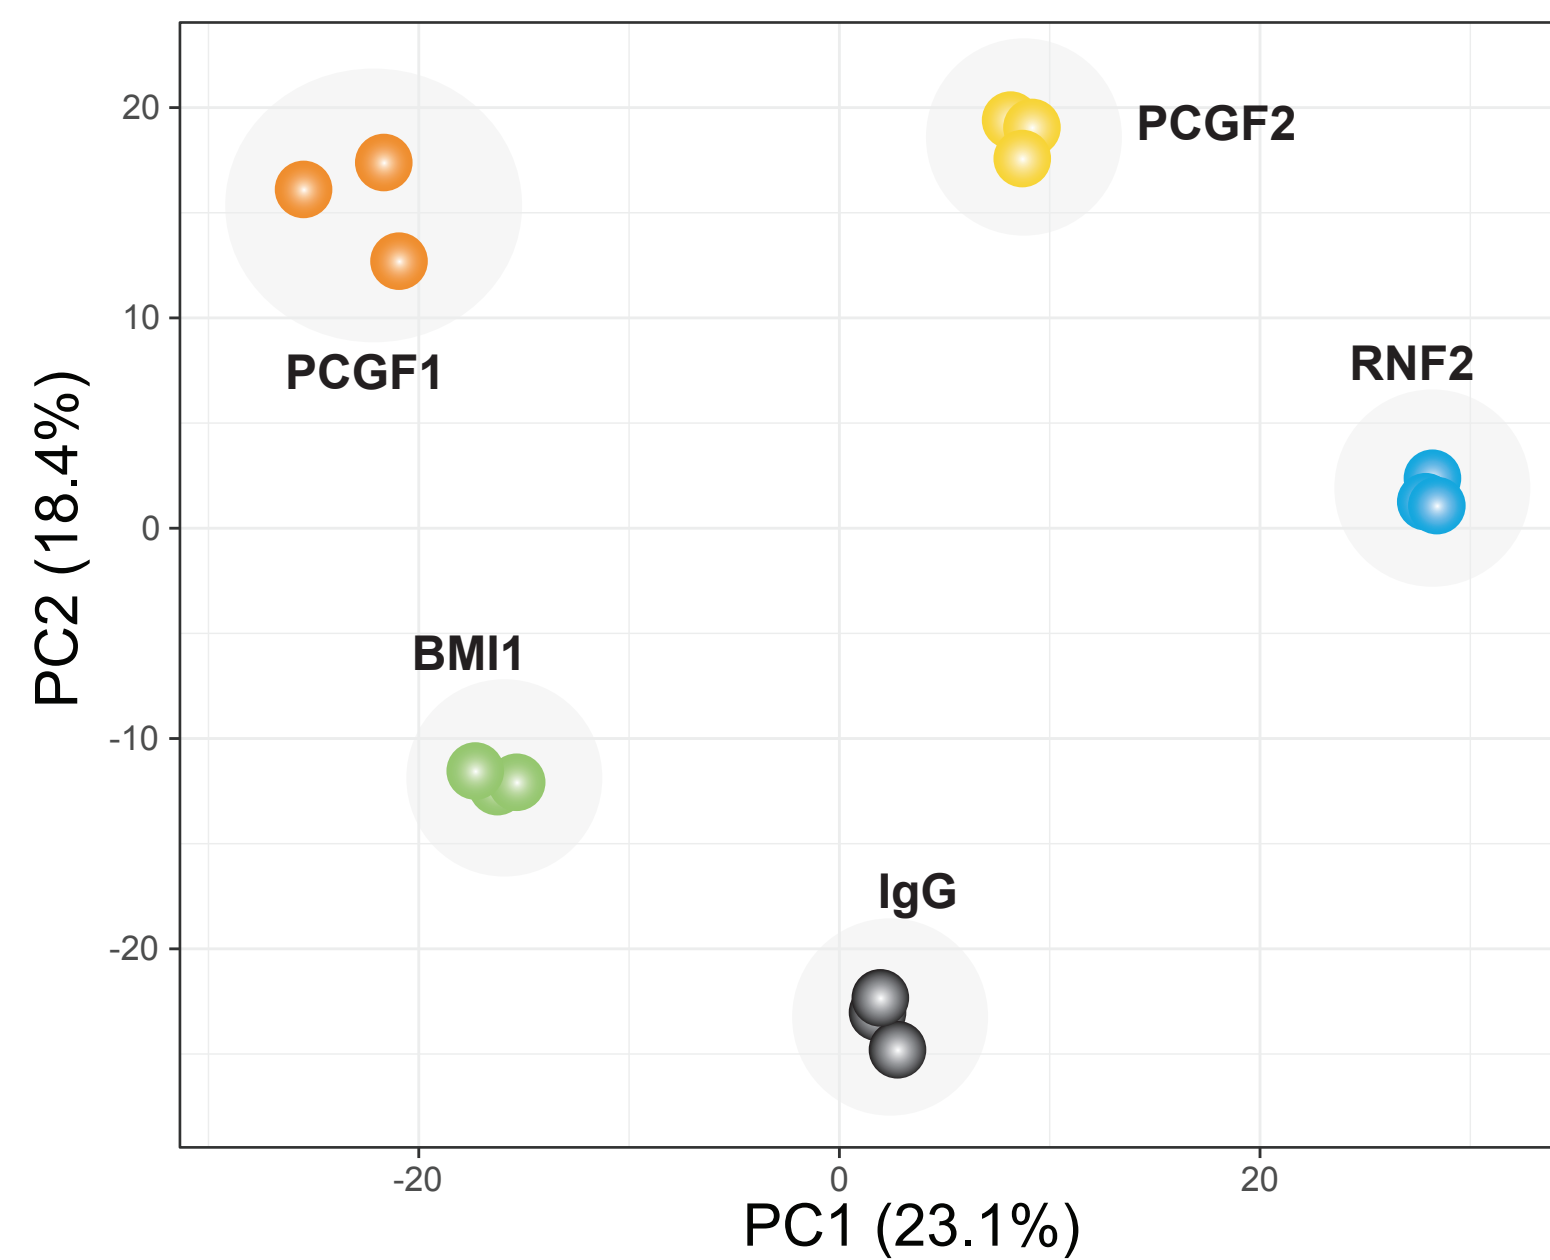**D**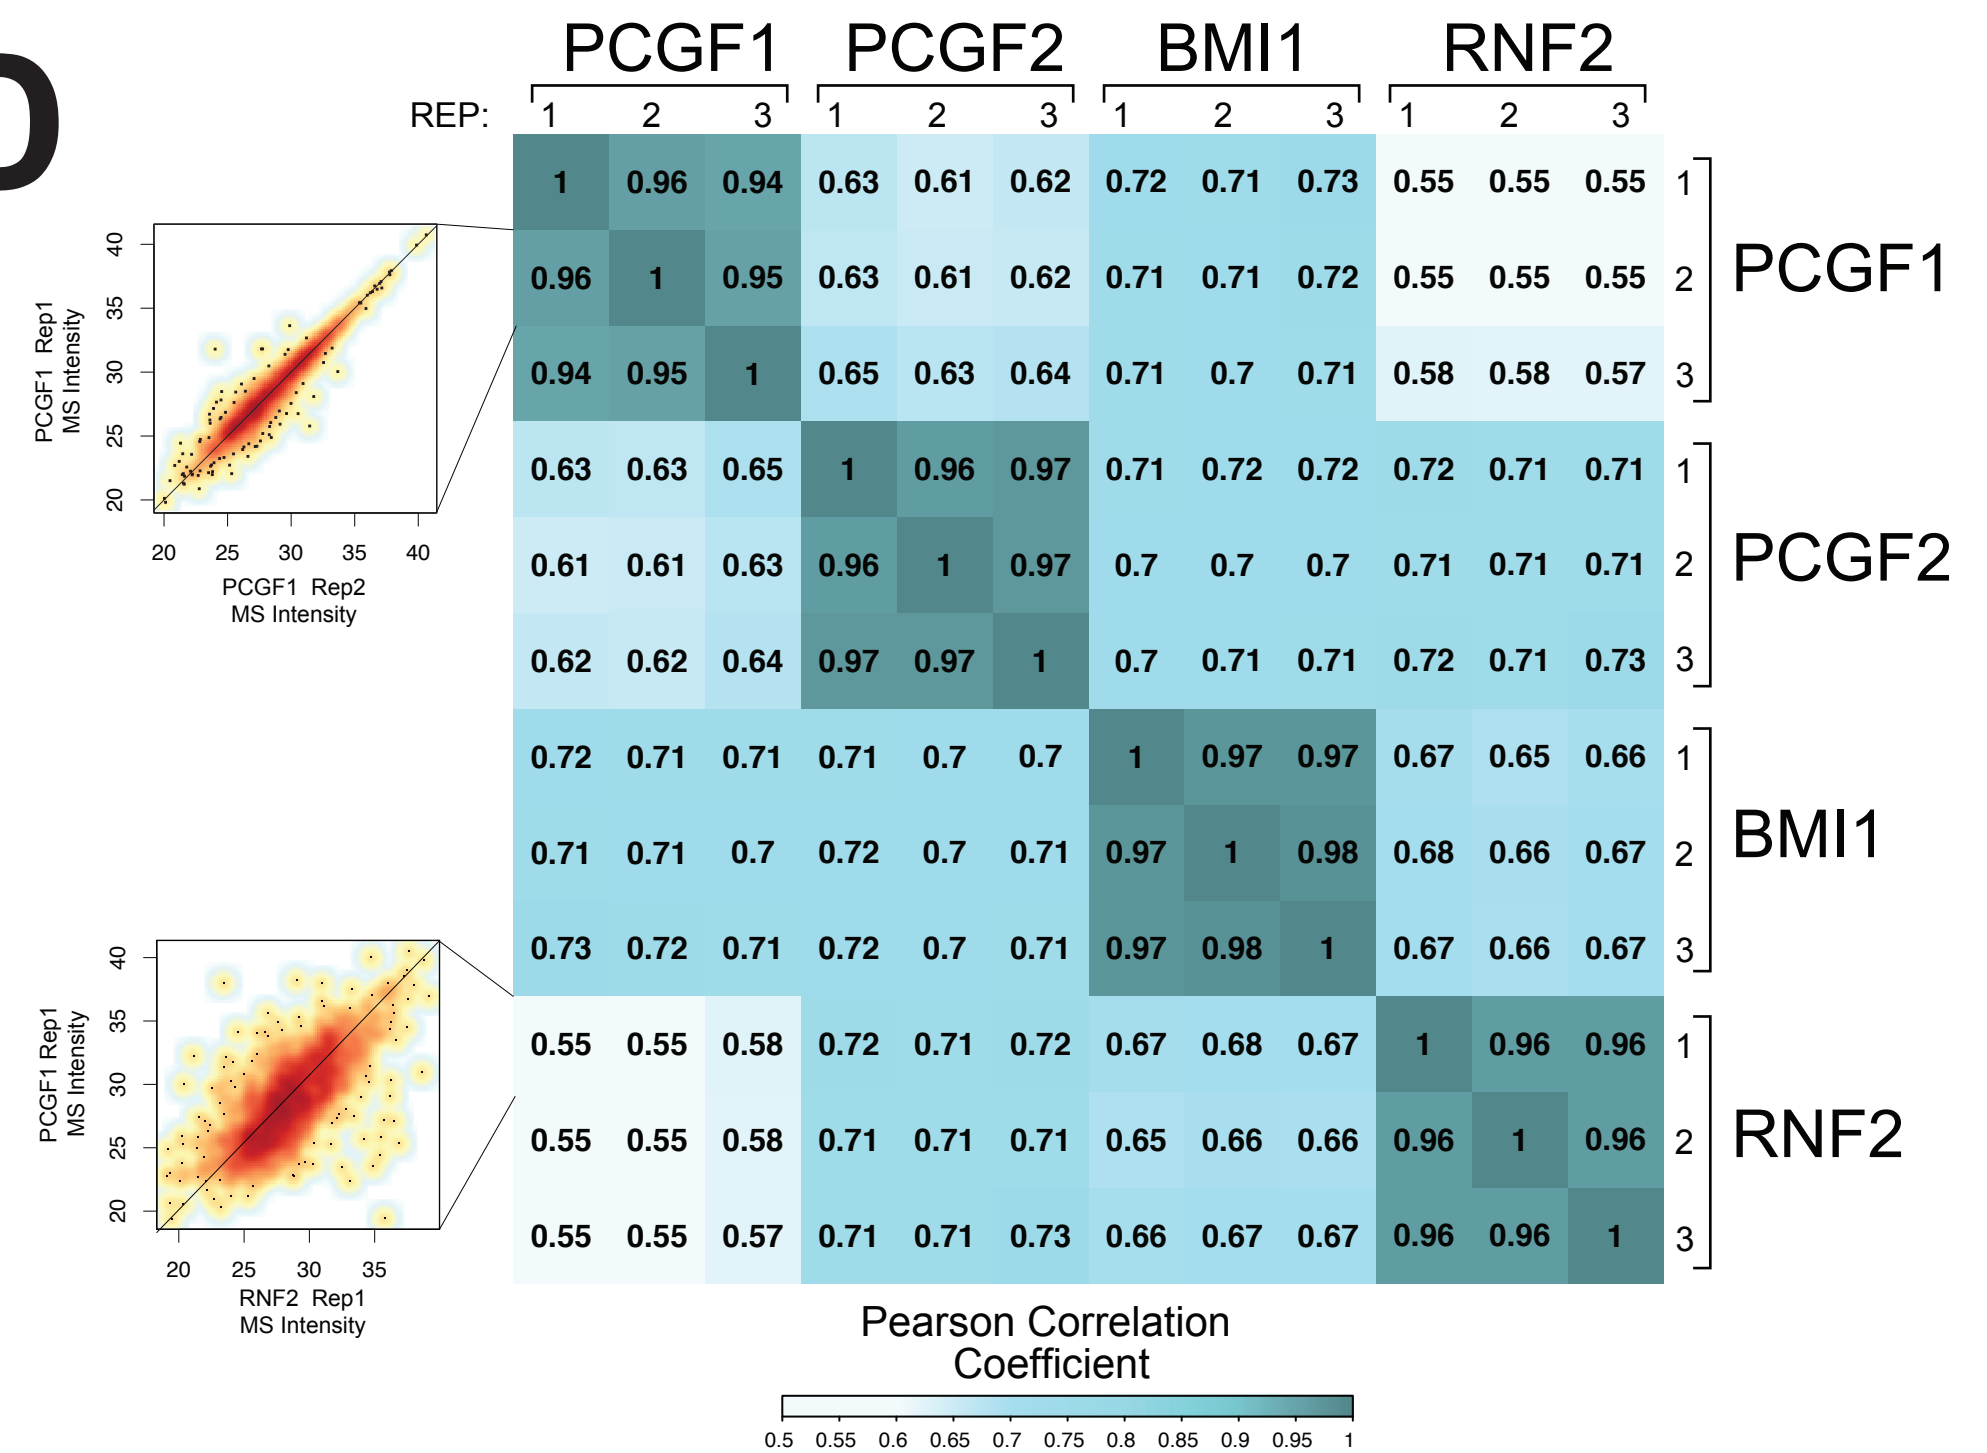



**A**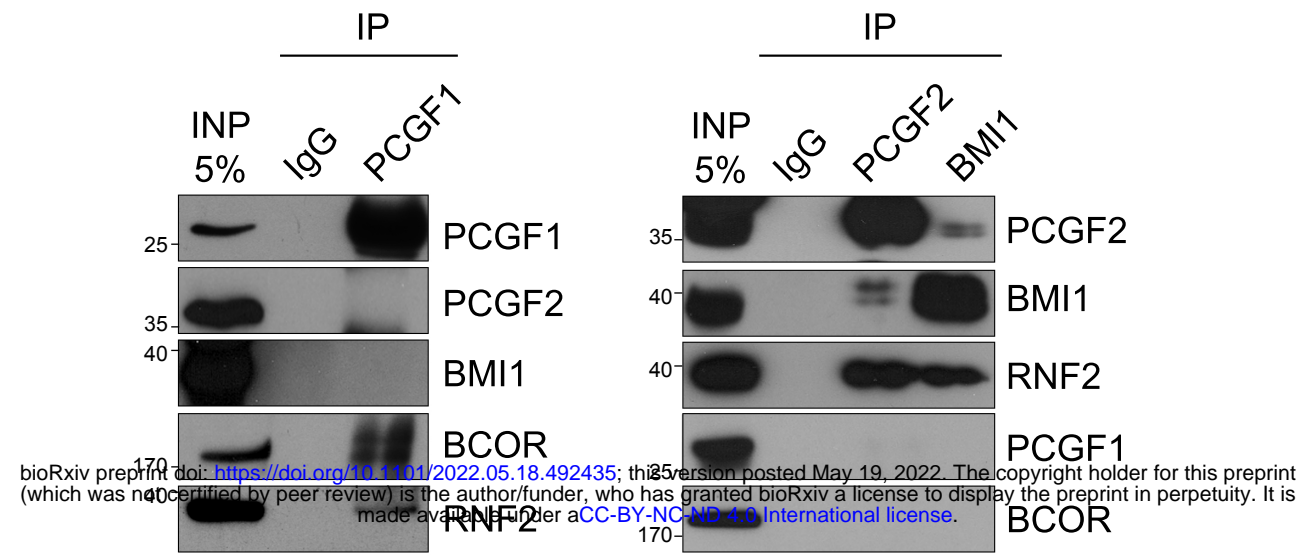**B**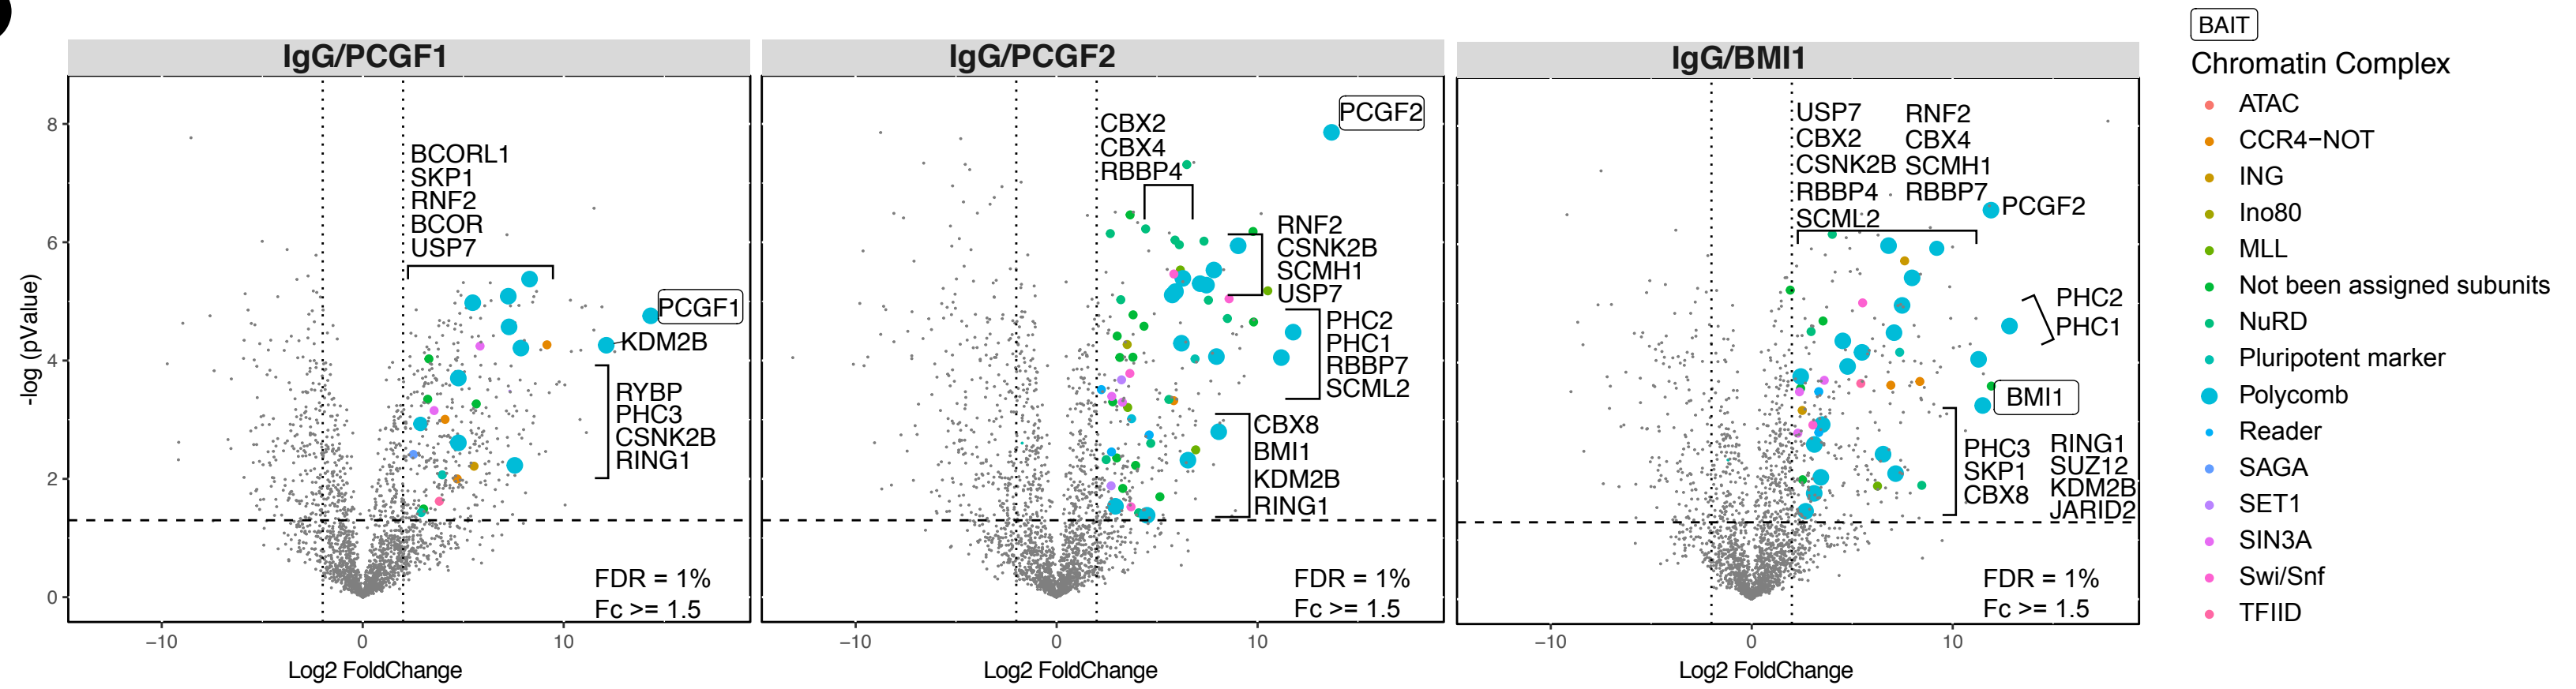**C**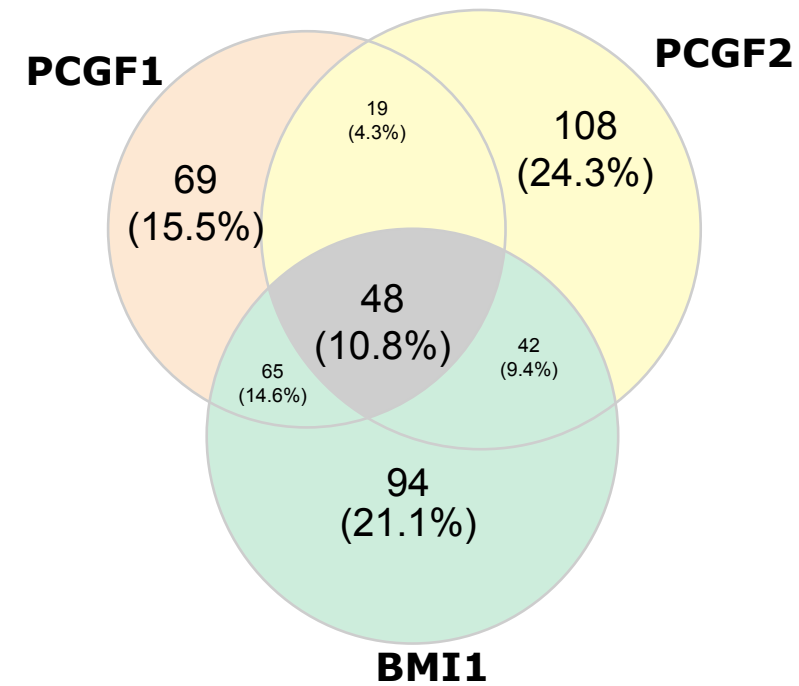

# A

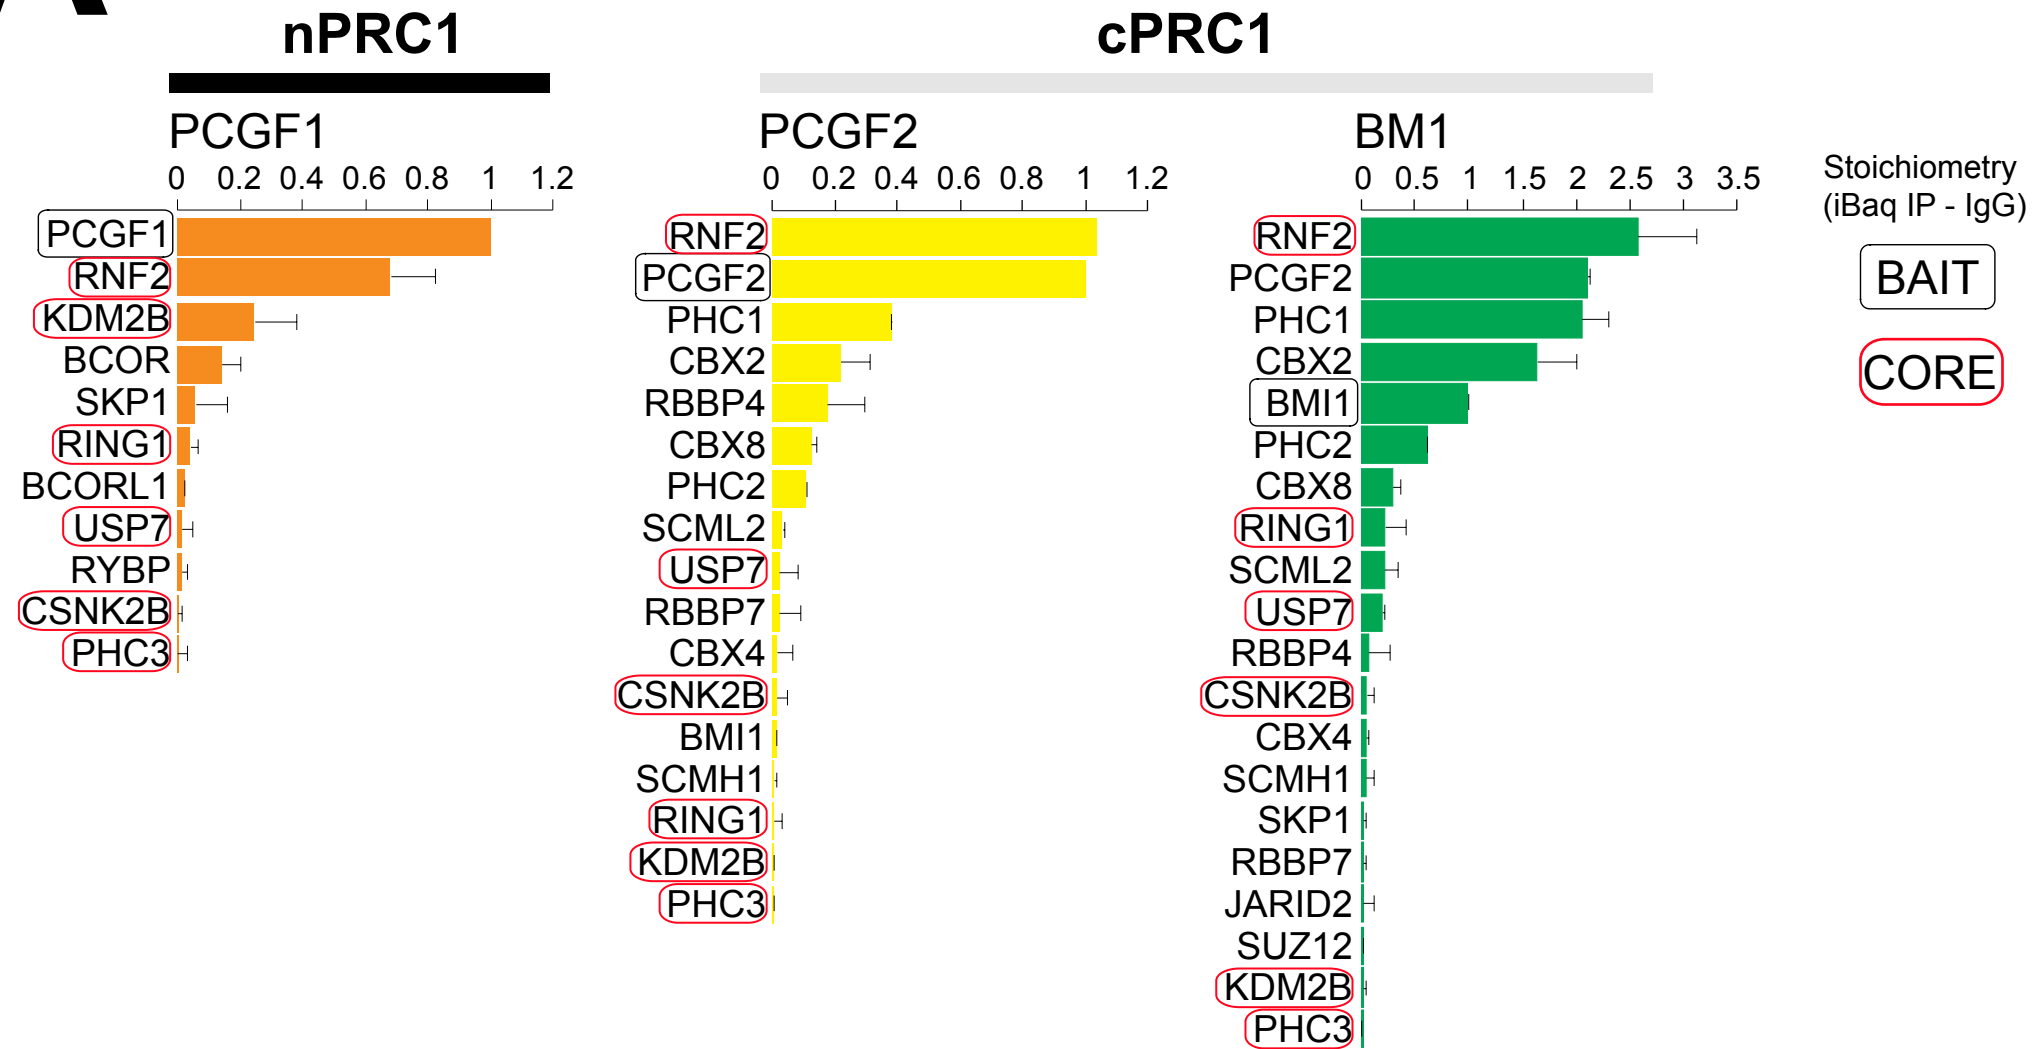

# B

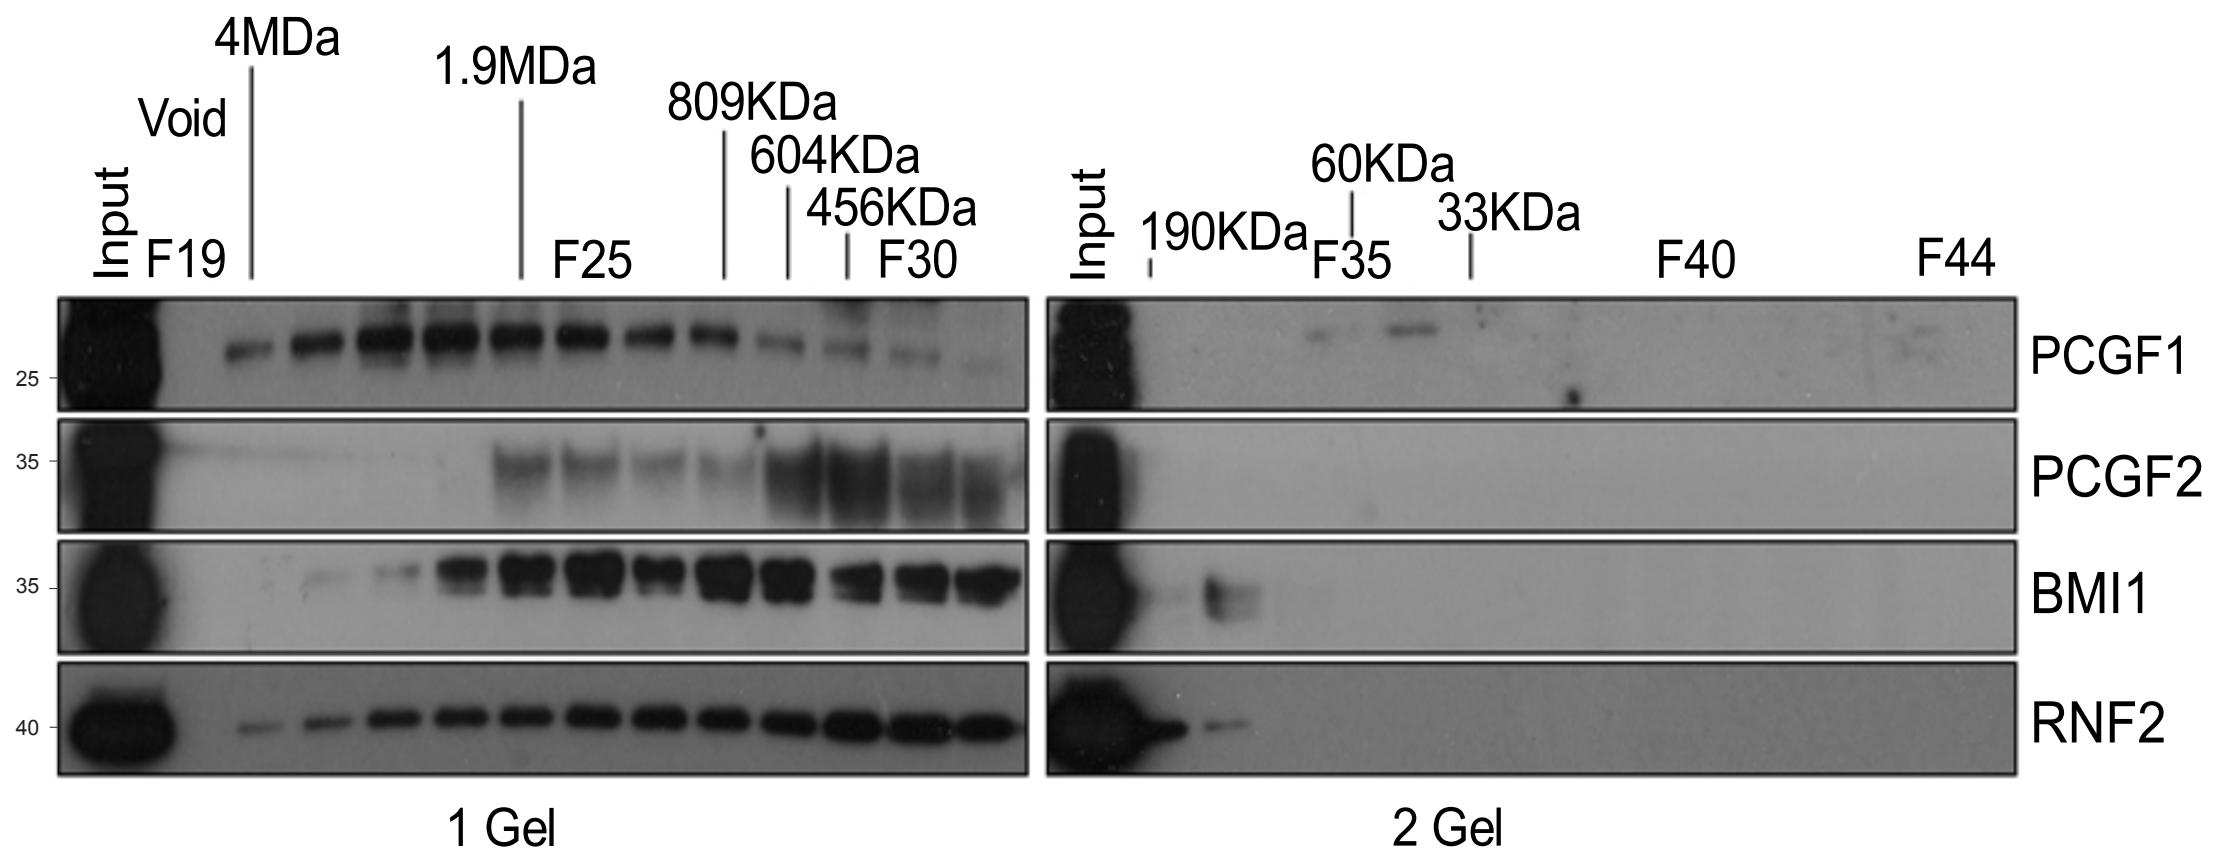



# A

## BP: Interactome

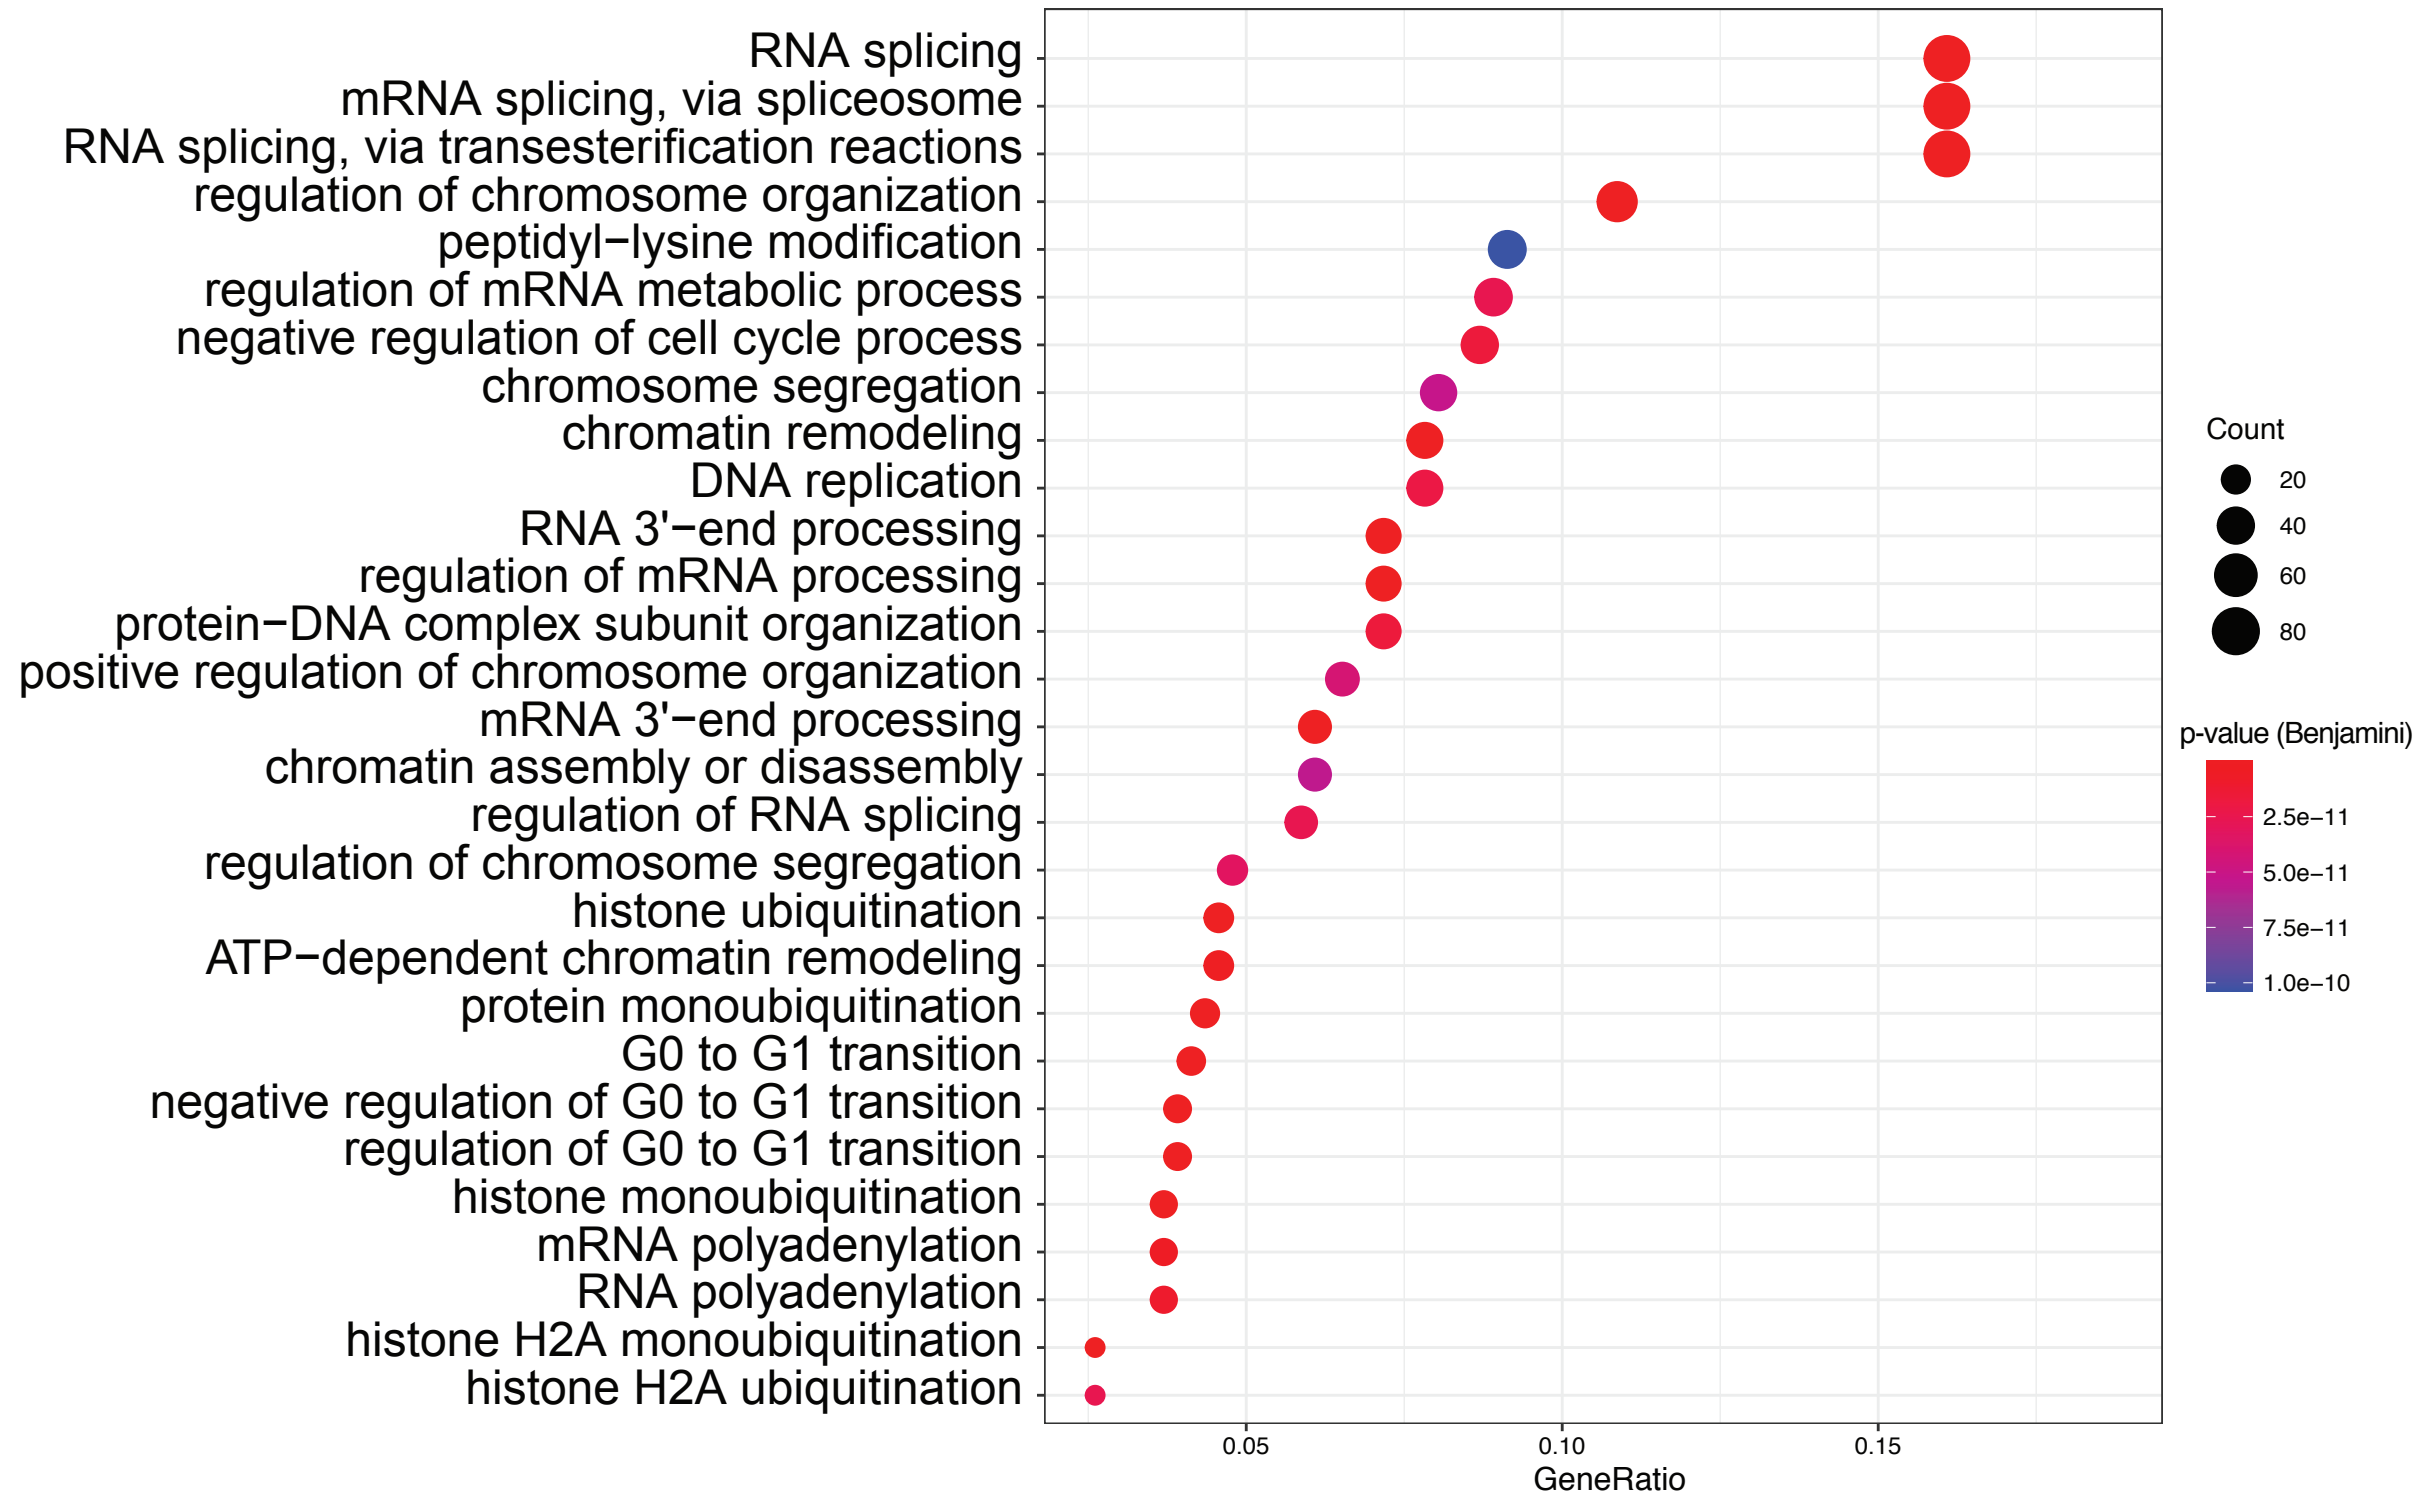

# B

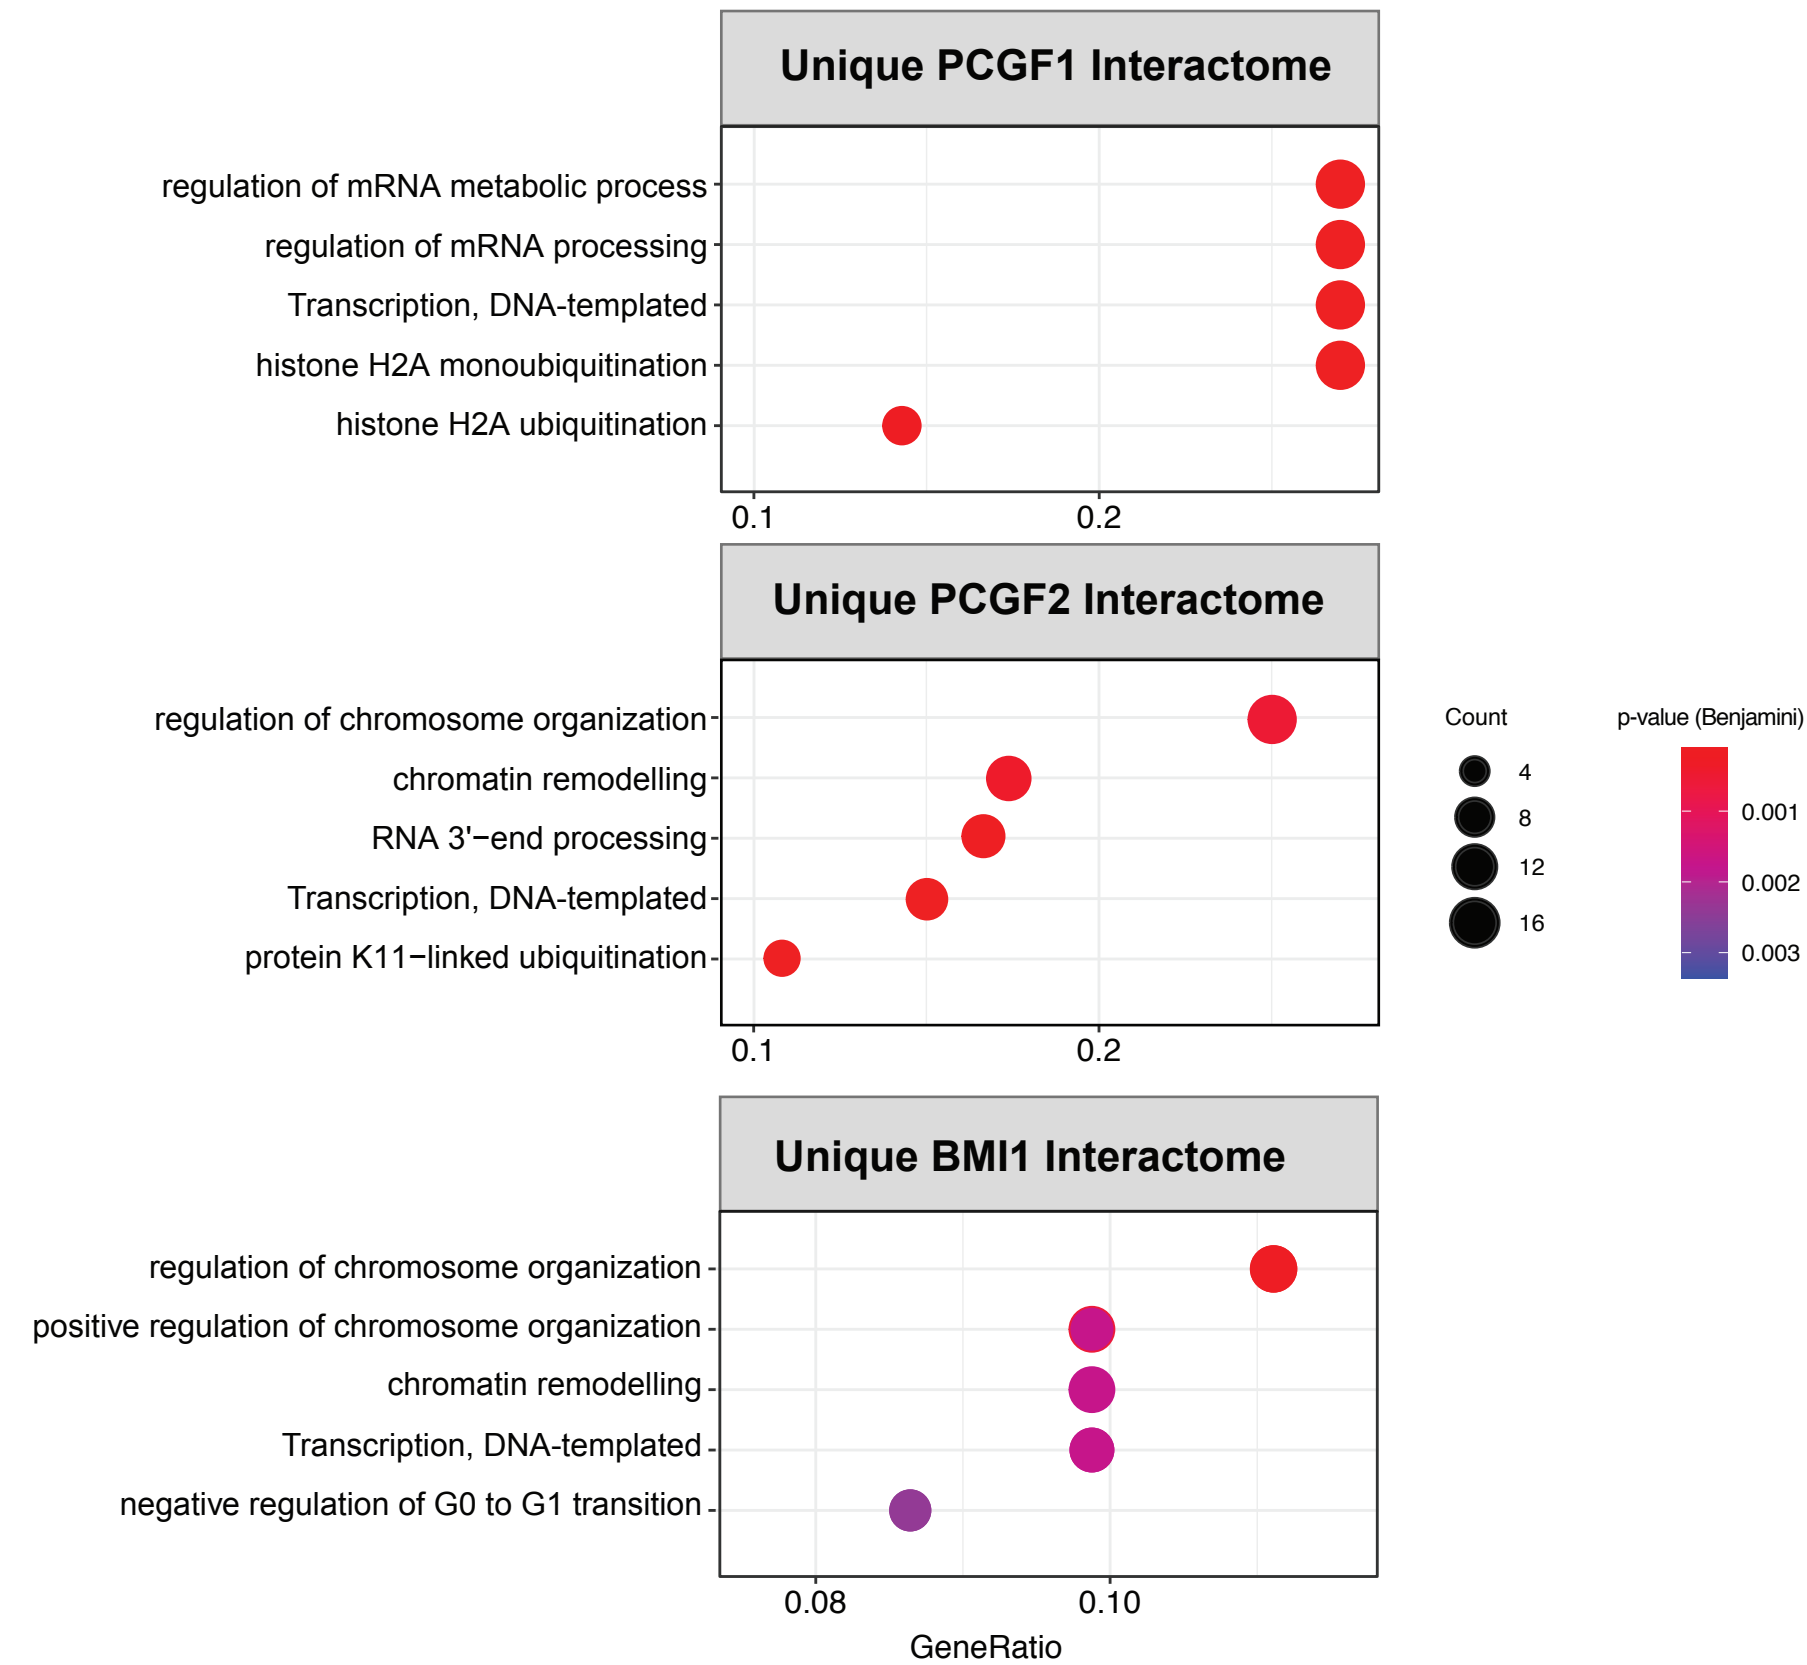

**A**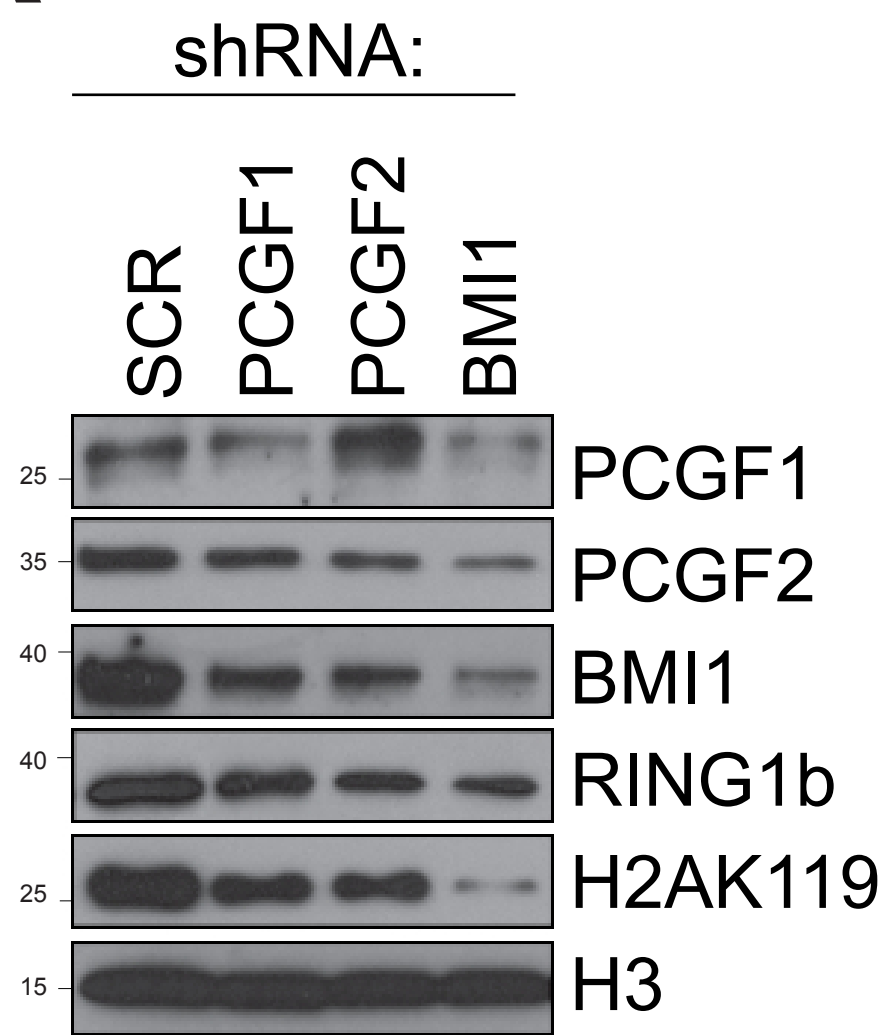**B**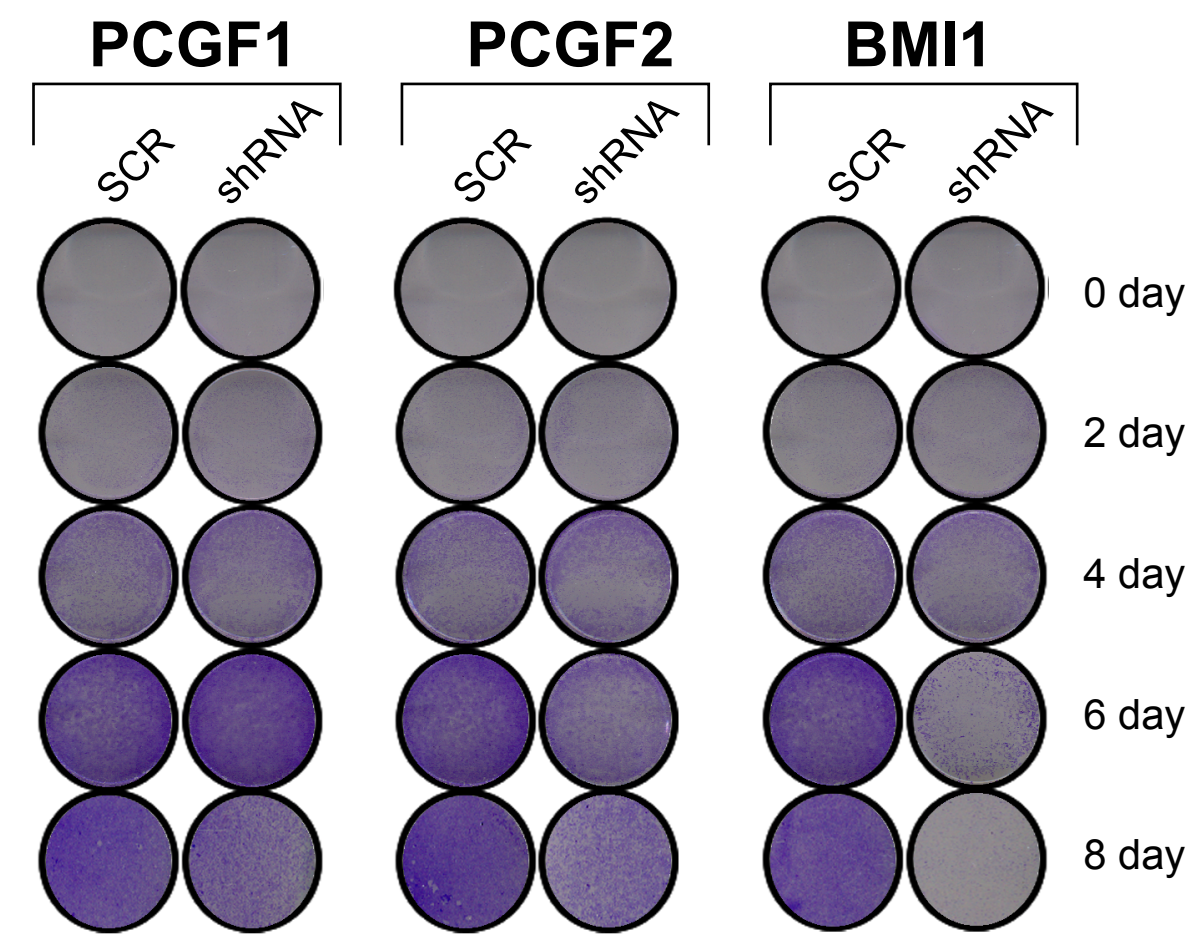**C**

bioRxiv preprint doi: <https://doi.org/10.1101/2022.05.18.492435>; this version posted May 19, 2022. The copyright holder for this preprint (which was not certified by peer review) is the author/funder, who has granted bioRxiv a license to display the preprint in perpetuity. It is made available under aCC-BY-NC-ND 4.0 International license.

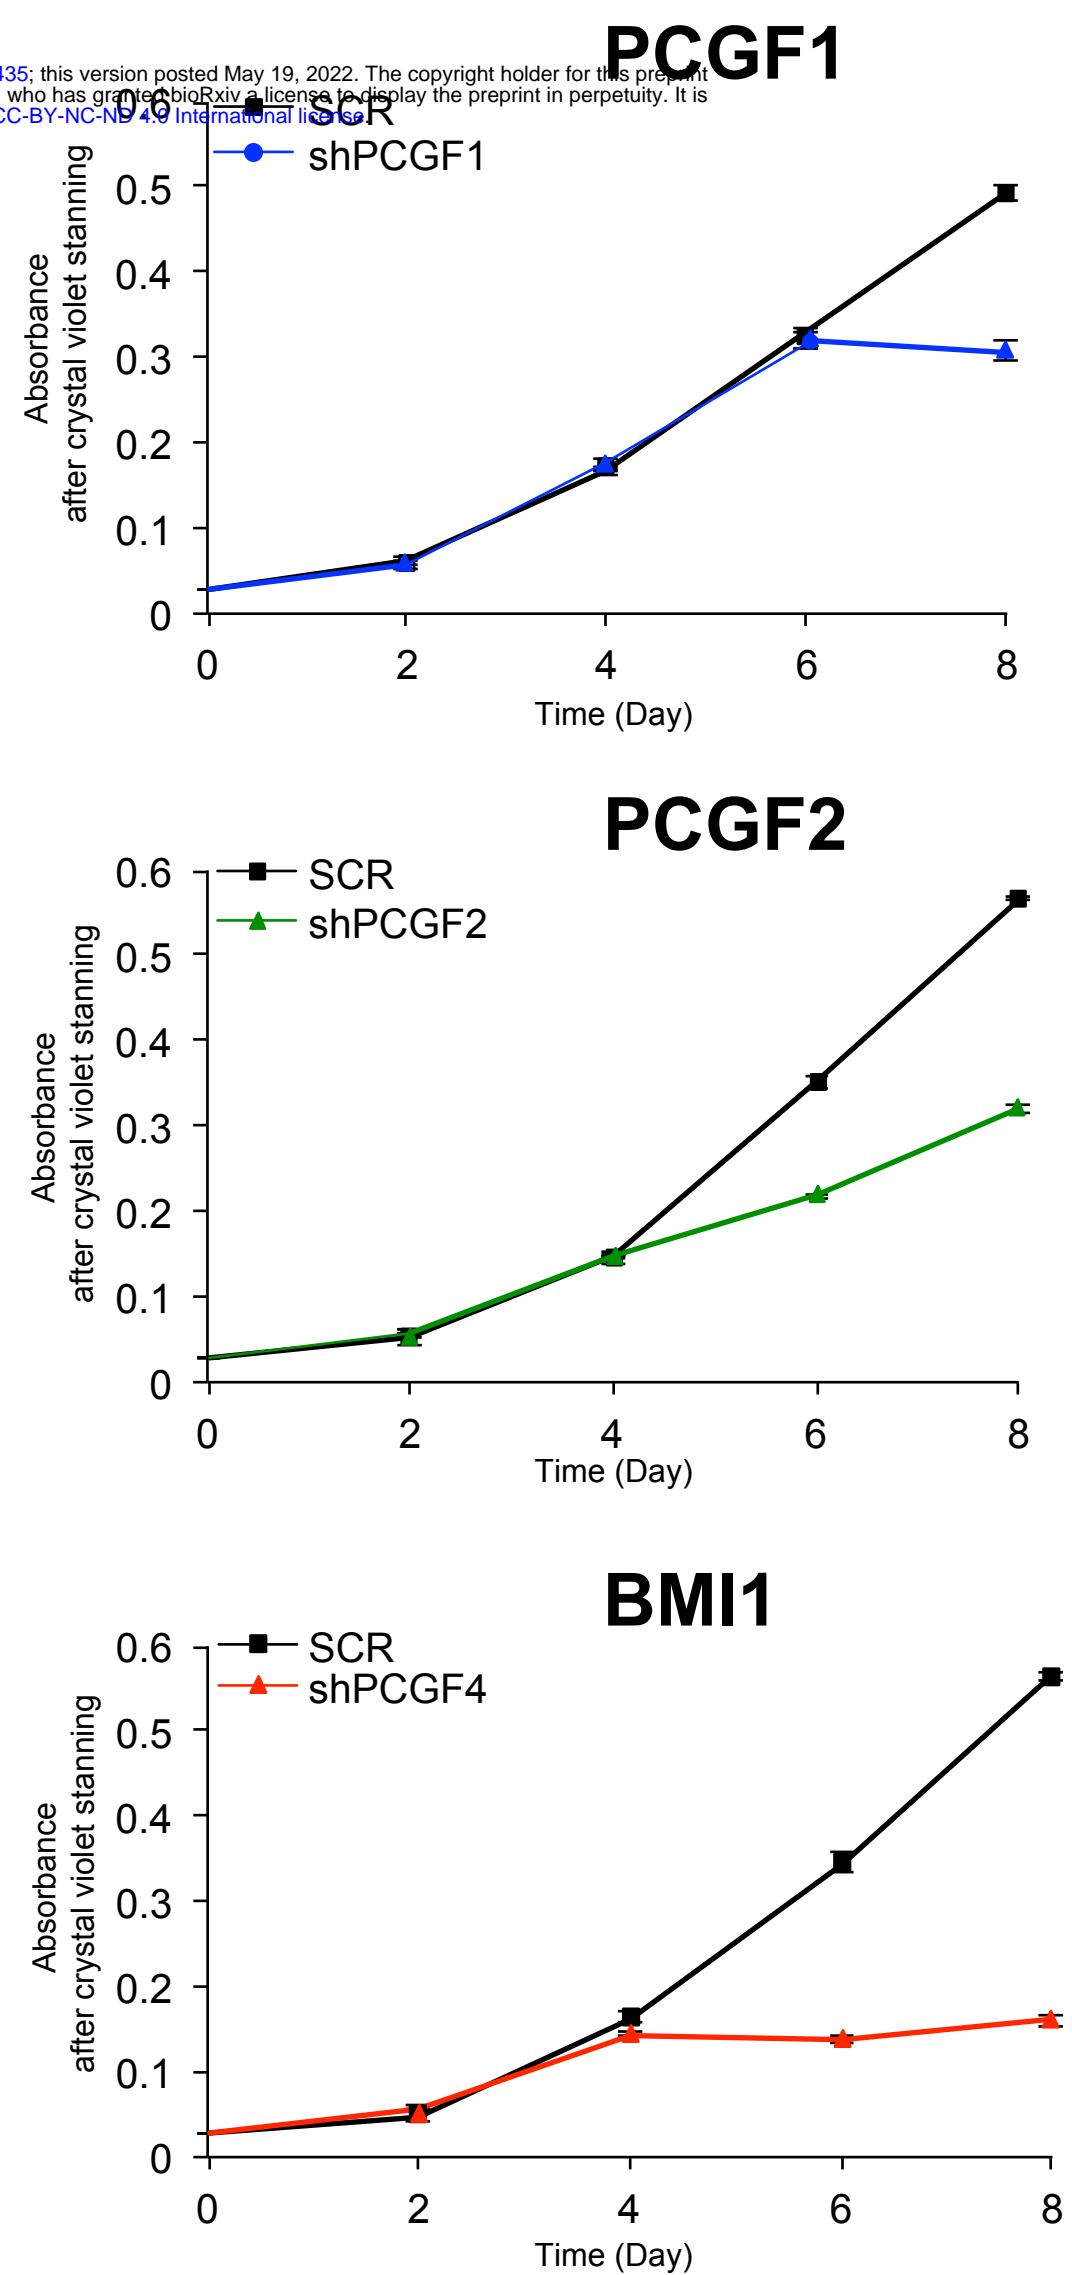**D**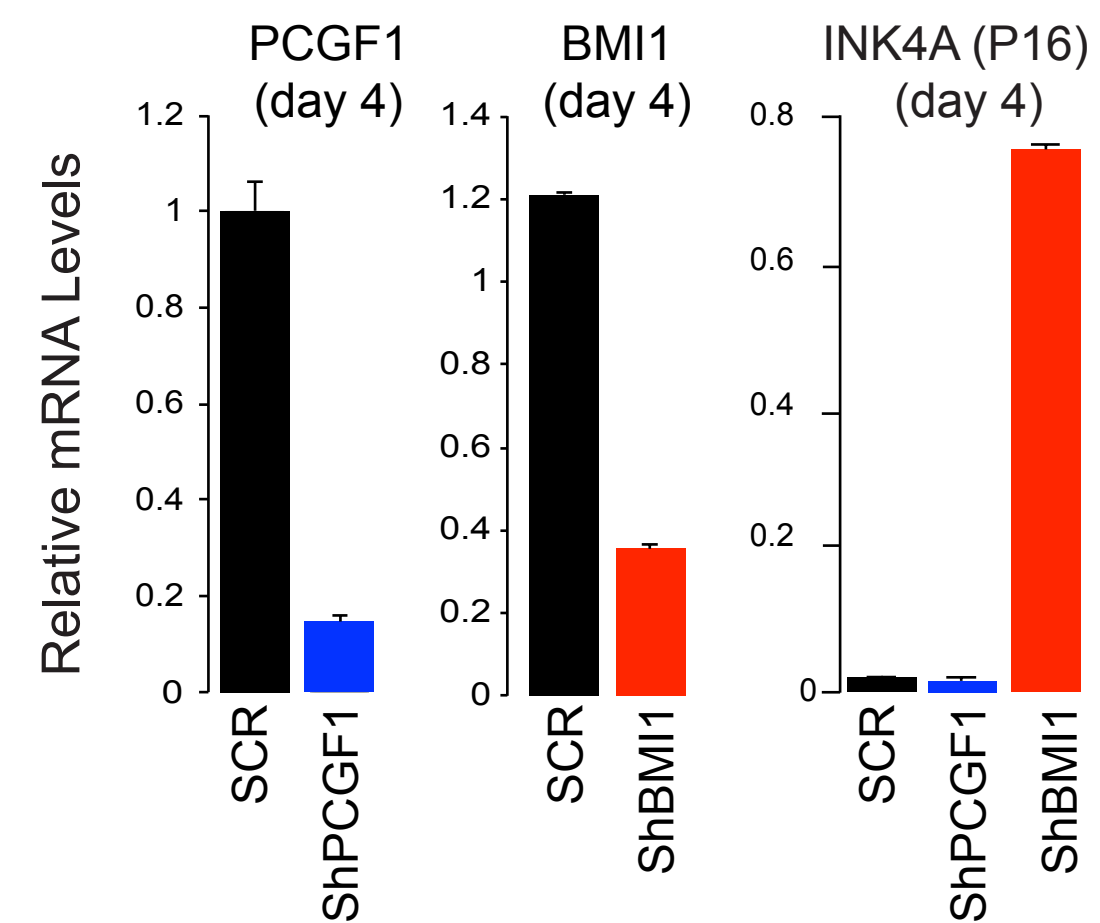**E**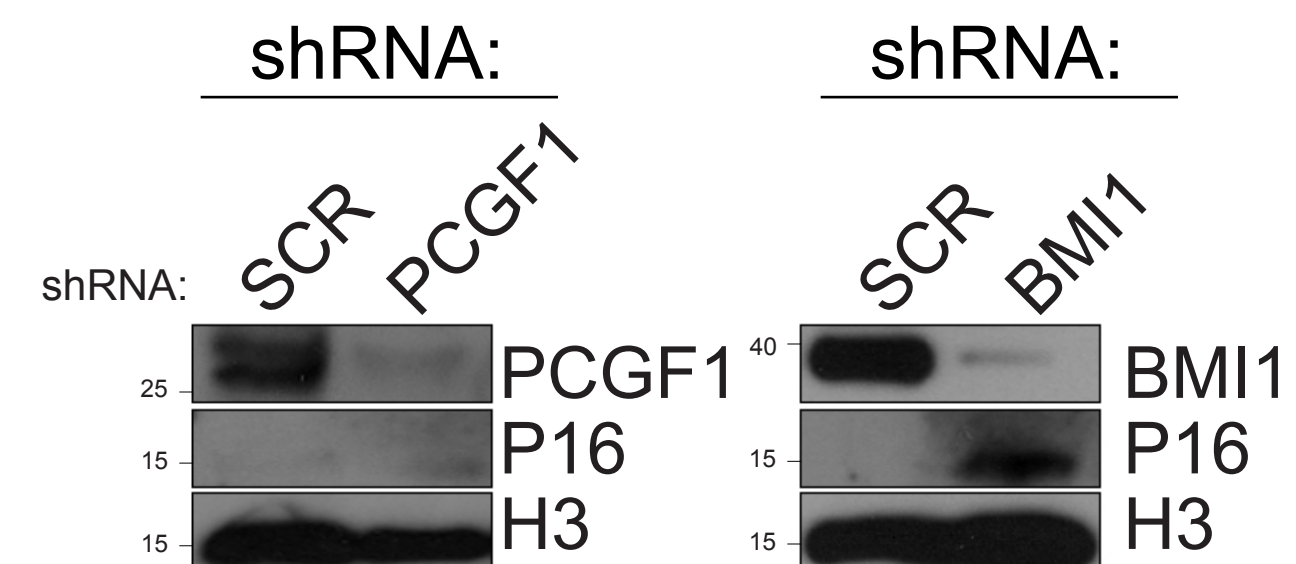

Source: https://www.biorxiv.org/content/10.1101/2022.05.18.492435v1.full.pdf
